# Supplementary material for: Indoline-5-Sulfonamides: A Role of the Core in Inhibition of Cancer-Related Carbonic Anhydrases, Antiproliferative Activity and Circumventing of Multidrug Resistance
Source: MDPI journal article supplement (doi:10.3390/ph15121453), 2022-11-23
Supplement: s1 [file s1]

# 1-benzoylindoline-5-sulfonamide (**4a**)

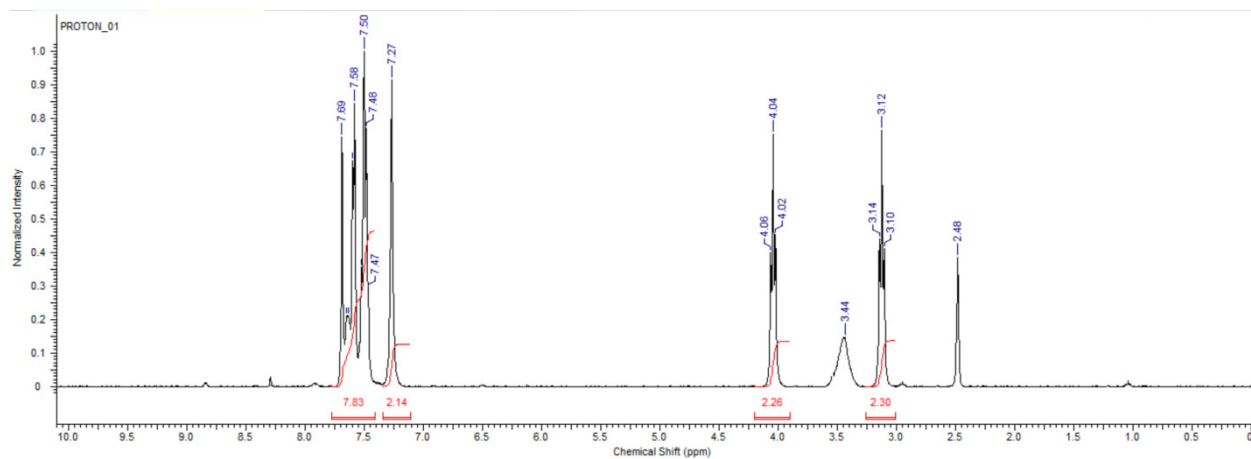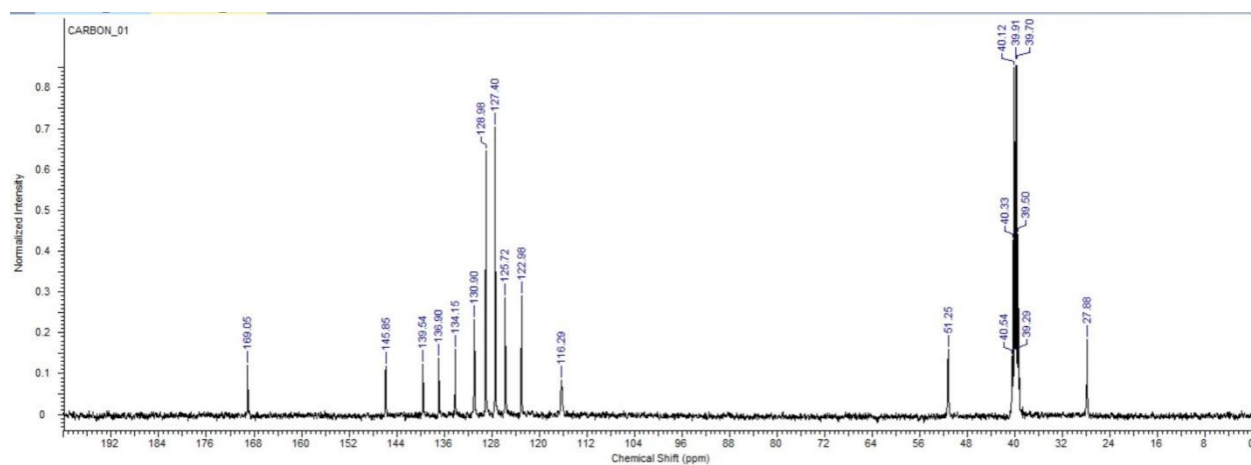

Chromatogram  
ST-11 C:\LabSolutions\Data\CHEK\ST O1011-03.lcd

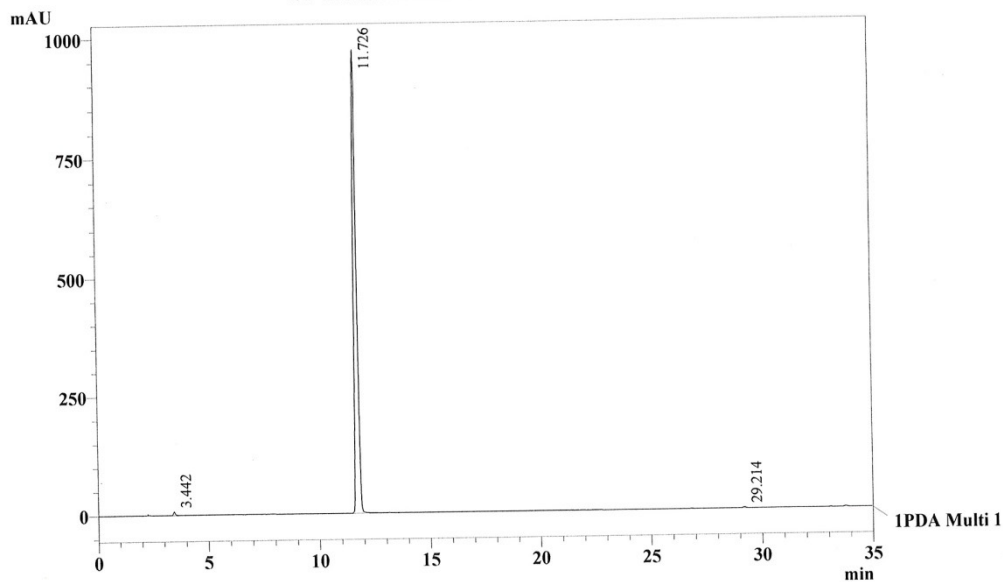

1 PDA Multi 1 / 300nm 4nm

PeakTable

PDA Ch1 300nm 4nm

| Peak# | Ret. Time | Area    | Height | Area %  |
|-------|-----------|---------|--------|---------|
| 1     | 3.442     | 43396   | 7426   | 0.472   |
| 2     | 11.726    | 9132228 | 973253 | 99.349  |
| 3     | 29.214    | 16412   | 1916   | 0.179   |
| Total |           | 9192035 | 982595 | 100.000 |

Method

<<LC Program>>

| Time  | Unit       | Command | Value |
|-------|------------|---------|-------|
| 0.10  | Pumps      | B.Conc  | 30    |
| 30.00 | Pumps      | B.Conc  | 70    |
| 33.00 | Pumps      | B.Conc  | 30    |
| 45.00 | Controller | Stop    |       |

Method Filename : FOS B.lcm

Shimadzu LC-20AD; 2-System FOS, Colon Kromasil 100-C18, size 5mk, 4,6\*250mm, N 86912  
Elution: A - H3PO4 0.01M pH 2.6; B - MeCN, fl. 1,0 ml/min, loop 20mkl.

# 1-(3-fluorobenzoyl)indoline-5-sulfonamide (**4b**)

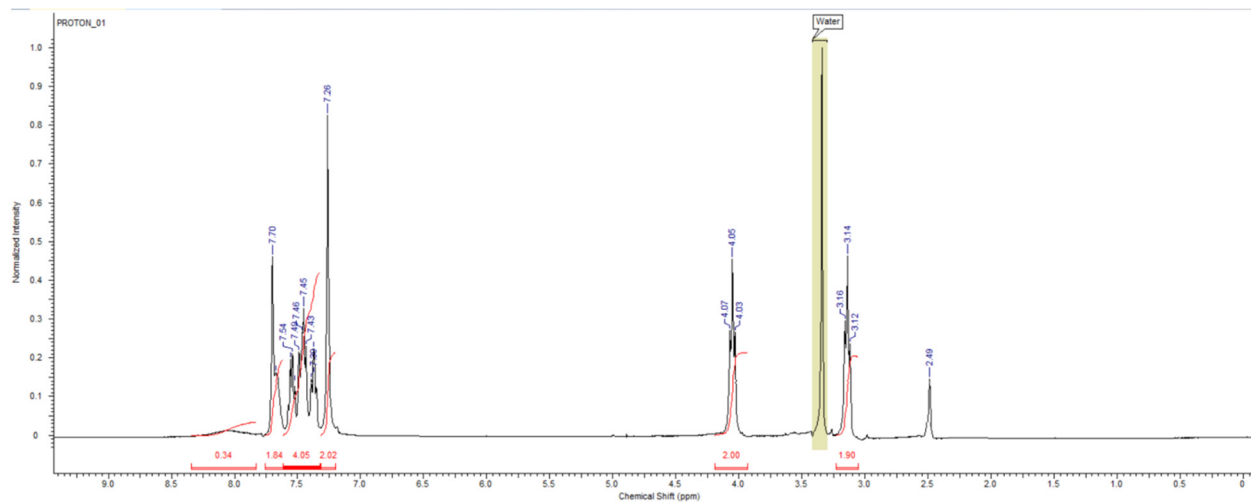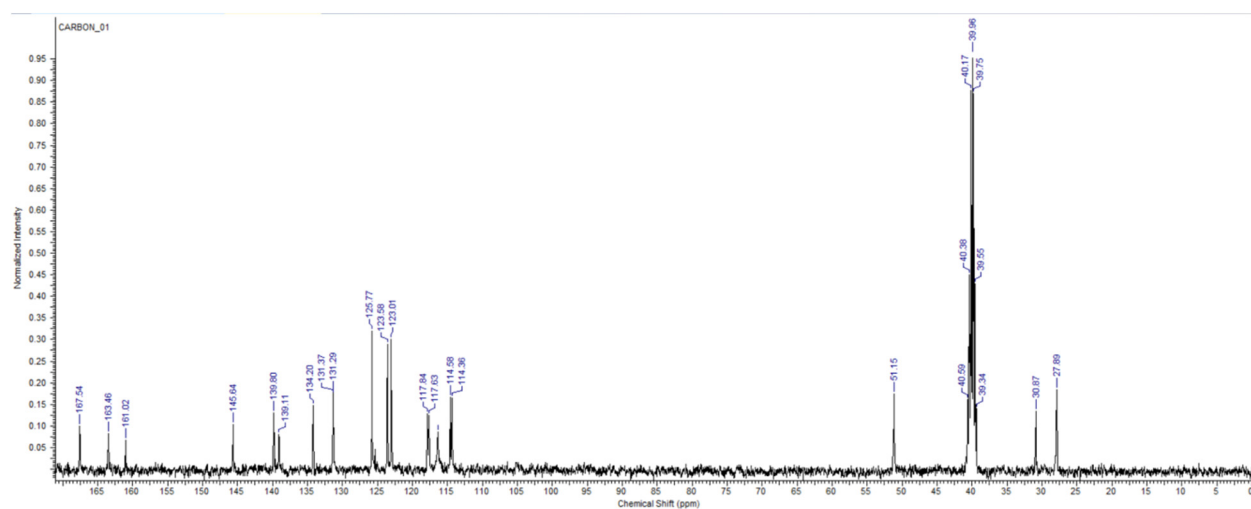

**Chromatogram**  
ST-110 C:\LabSolutions\Data\CHEK\ST P1030-03.lcd

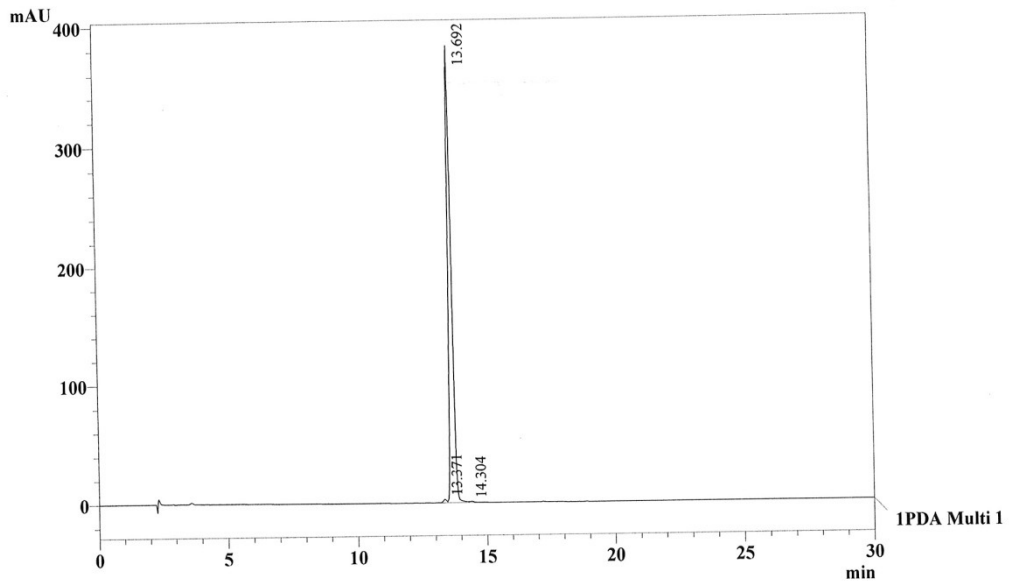

1 PDA Multi 1 / 300nm 4nm

PeakTable

PDA Ch1 300nm 4nm

| Peak# | Ret. Time | Area    | Height | Area %  |
|-------|-----------|---------|--------|---------|
| 1     | 13.371    | 23986   | 2782   | 0.683   |
| 2     | 13.692    | 3478688 | 382890 | 99.080  |
| 3     | 14.304    | 8303    | 590    | 0.236   |
| Total |           | 3510977 | 386261 | 100.000 |

Method

<<LC Program>>

| Time  | Unit       | Command | Value |
|-------|------------|---------|-------|
| 0.10  | Pumps      | B.Conc  | 30    |
| 30.00 | Pumps      | B.Conc  | 70    |
| 33.00 | Pumps      | B.Conc  | 30    |
| 45.00 | Controller | Stop    |       |

Method Filename : FOS B.lcm

Shimadzu LC-20AD; 2-System FOS, Colon Kromasil 100-C18,,size 5mkm, 4,6\*250mm, N 86912  
Elution: A - H3PO4 0.01M pH 2.6; B - MeCN, fl. 1,0 ml/min, loop 20mkI.

# 1-(4-fluorobenzoyl)indoline-5-sulfonamide (**4c**)

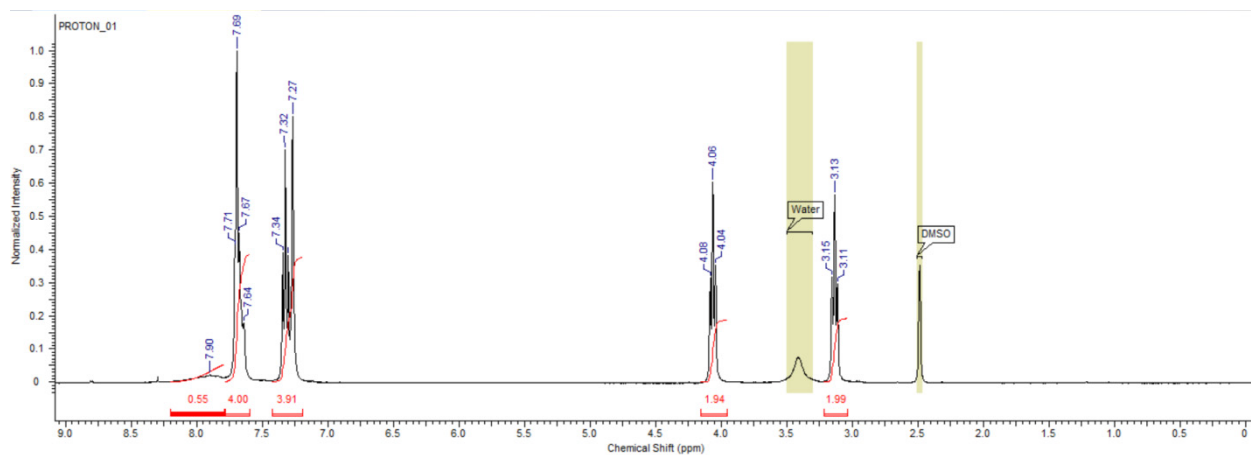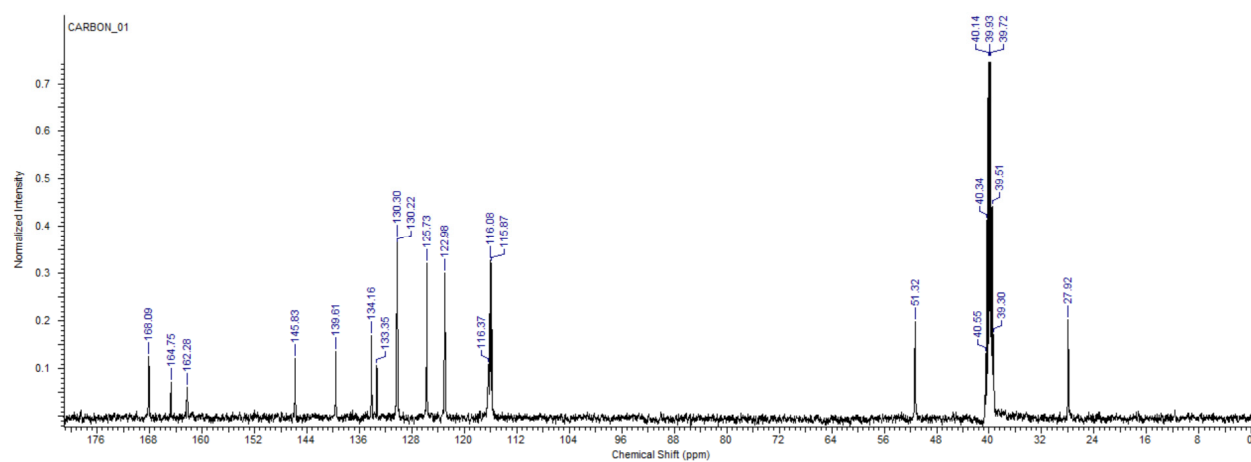

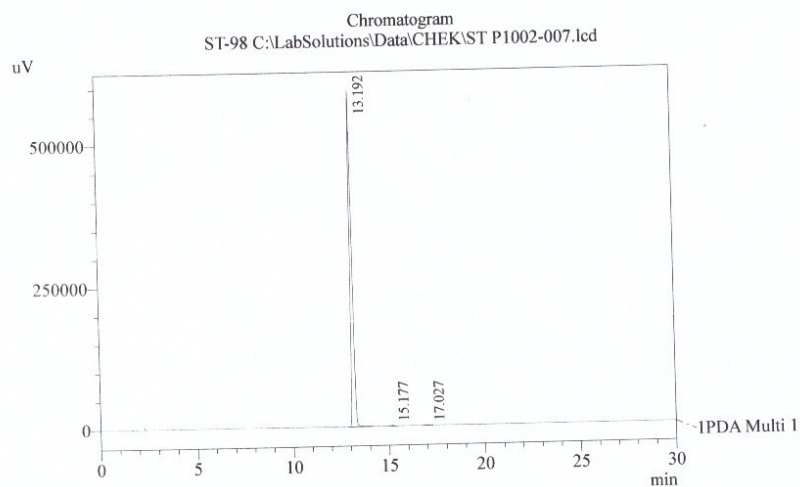

1 PDA Multi 1 / 300nm 4nm

PDA Ch1 300nm 4nm

| Peak# | Ret. Time | Area    | Height | Area %  |
|-------|-----------|---------|--------|---------|
| 1     | 13.192    | 4940418 | 594007 | 99.603  |
| 2     | 15.177    | 12191   | 1501   | 0.246   |
| 3     | 17.027    | 7507    | 946    | 0.151   |
| Total |           | 4960116 | 596454 | 100.000 |

Method Filename : FOS B.lcm 05.10.2020 14:44:25

| Time  | Unit       | Command | Valu |
|-------|------------|---------|------|
| 0.01  | Pumps      | B.Conc  | 30   |
| 30.00 | Pumps      | B.Conc  | 70   |
| 33.00 | Pumps      | B.Conc  | 30   |
| 45.00 | Controller | Stop    |      |

Shimadzu LC-20 AD; System - FOS Colon- Kromasil-100-5mkm. C-18, 4,6x250 mm. N 62511  
Elution: A - H3PO4 0,01M pH 2,6; B - MeCN, fl - 1.0 ml/min, loop 20 mkl

# 1-(2,6-difluorobenzoyl)indoline-5-sulfonamide (**4d**)

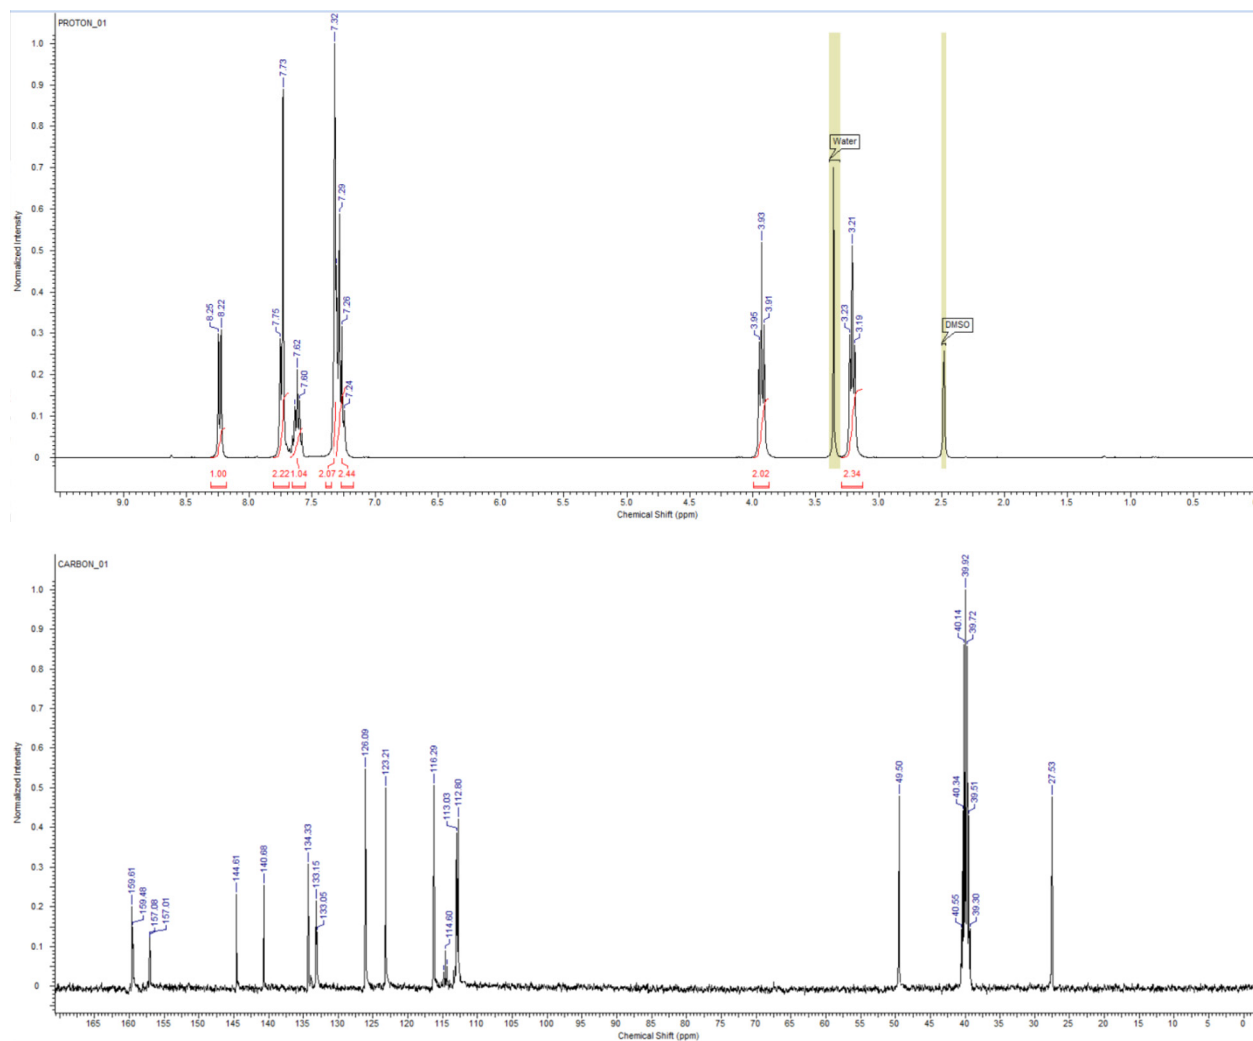

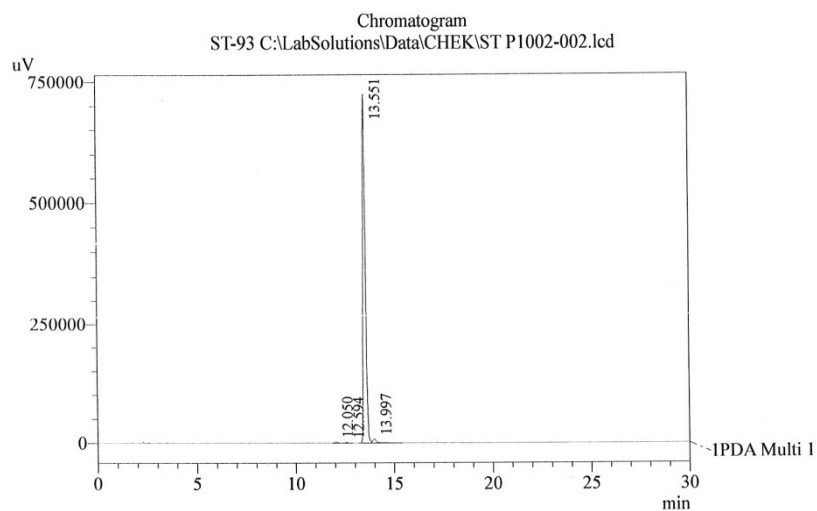

1 PDA Multi 1 / 270nm 4nm

PDA Ch1 270nm 4nm

| Peak# | Ret. Time | Area    | Height | Area %  |
|-------|-----------|---------|--------|---------|
| 1     | 12.050    | 26734   | 2569   | 0.382   |
| 2     | 12.594    | 13156   | 1519   | 0.188   |
| 3     | 13.551    | 6835590 | 725024 | 97.689  |
| 4     | 13.997    | 121848  | 8601   | 1.741   |
| Total |           | 6997327 | 737713 | 100.000 |

Method Filename : FOS B.lcm 02.10.2020 14:08:30

| Time  | Unit       | Command | Valu |
|-------|------------|---------|------|
| 0.01  | Pumps      | B.Conc  | 30   |
| 30.00 | Pumps      | B.Conc  | 70   |
| 33.00 | Pumps      | B.Conc  | 30   |
| 45.00 | Controller | Stop    |      |

Shimadzu LC-20 AD; System - FOS Colon- Kromasil-100-5mkm. C-18, 4,6x250 mm. N 62511  
Elution: A - H3PO4 0,01M pH 2,6; B - MeCN, fl - 1.0 ml/min, loop 20 mk1

# 1-(perfluorobenzoyl)indoline-5-sulfonamide (**4e**)

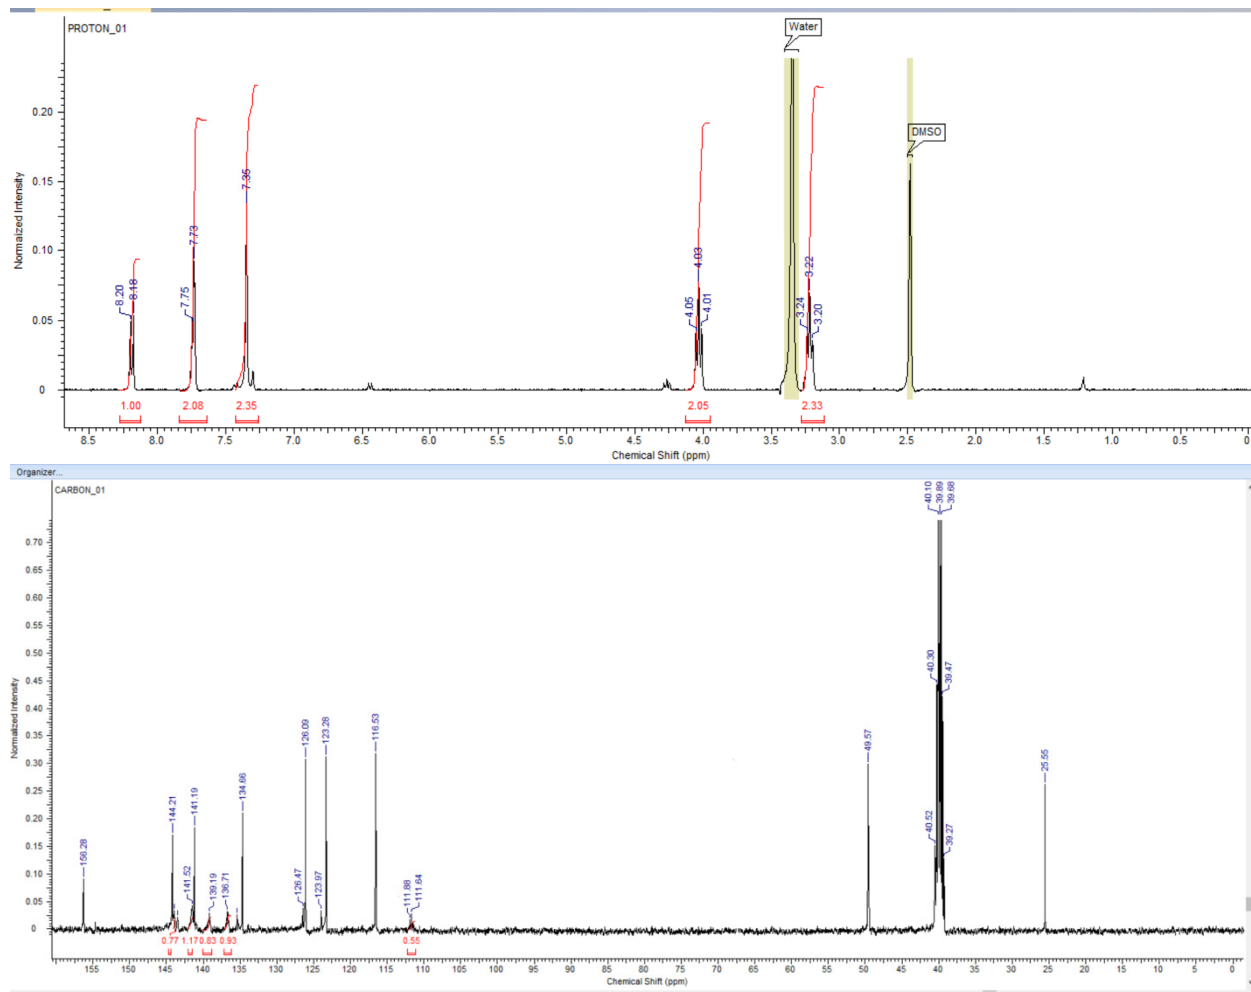

Title: \*\*ST-12 3238

Пн Ноя 07 12:36:46 2022 (G

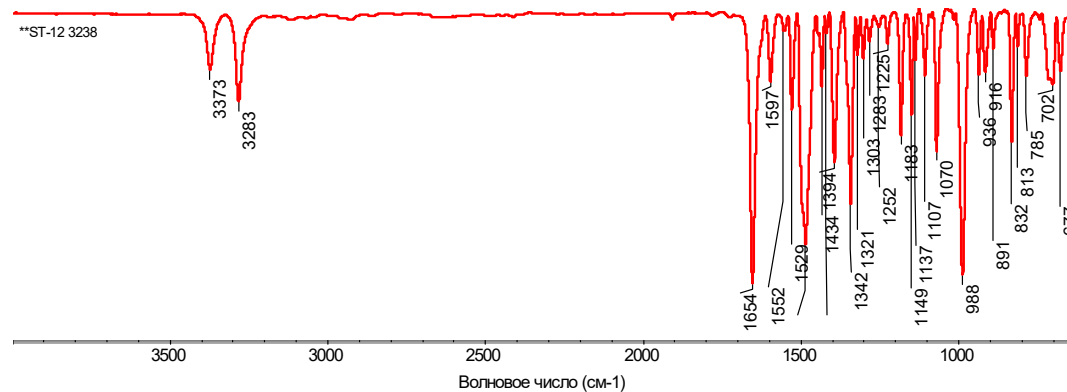

Expanded fingerprint region:

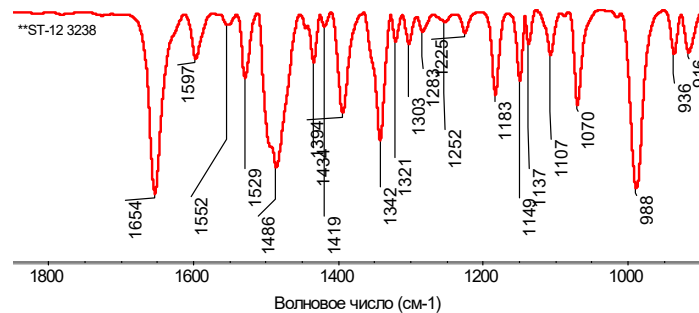

Время измерения: Пн Ноя 07 12:15:28 2022  
Число сканов пробы: 64  
Число сканов сравнения: 64  
Разрешение: 4.000  
Усиление: 8.0  
Скорость зеркала: 0.4747  
Диафрагма: 150.00

Chromatogram  
ST-12 C:\LabSolutions\Data\CHEK\ST O1018-02.lcd

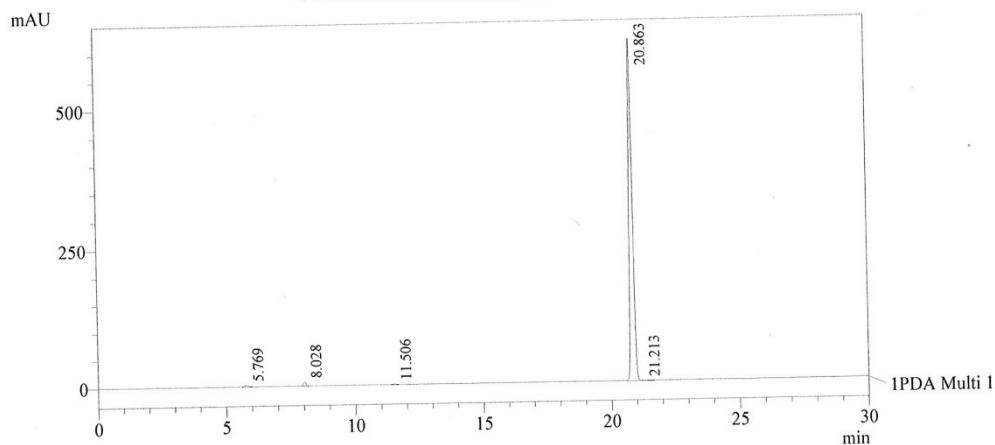

1 PDA Multi 1 / 300nm 4nm

PeakTable

PDA Ch1 300nm 4nm

| Peak# | Ret. Time | Area    | Height | Area %  |
|-------|-----------|---------|--------|---------|
| 1     | 5.769     | 22824   | 2434   | 0.399   |
| 2     | 8.028     | 45020   | 6624   | 0.787   |
| 3     | 11.506    | 7331    | 1074   | 0.128   |
| 4     | 20.863    | 5640910 | 615704 | 98.552  |
| 5     | 21.213    | 7713    | 662    | 0.135   |
| Total |           | 5723799 | 626499 | 100.000 |

Method

<<LC Program>>

| Time  | Unit       | Command | Value |
|-------|------------|---------|-------|
| 0.10  | Pumps      | B.Conc  | 30    |
| 30.00 | Pumps      | B.Conc  | 70    |
| 33.00 | Pumps      | B.Conc  | 30    |
| 45.00 | Controller | Stop    |       |

Sample Information

Method Filename : FRA02 Bv A.lcm  
Date Acquired : 18.10.2019

Shimadzu LC-20AD; 2-System FRA02vA, Colon Kromasil 100-C18, size 5µm, 4,6\*250mm, N 44650  
Elution: A - COOHNH4 0,2% pH4.5 : B - MeCN, fl. 1,0 ml/min, loop 20µl.

# 1-(3-chlorobenzoyl)indoline-5-sulfonamide (4f)

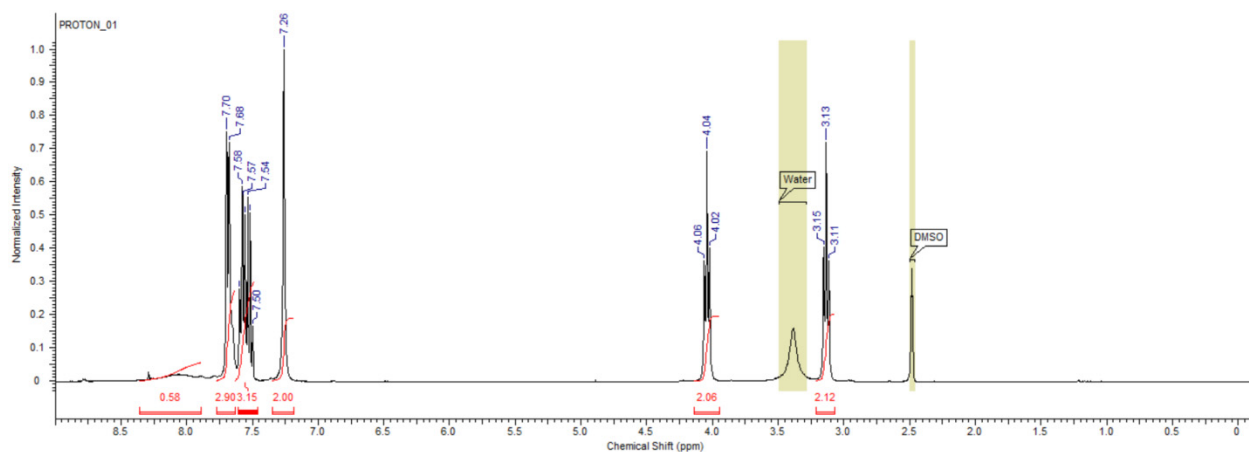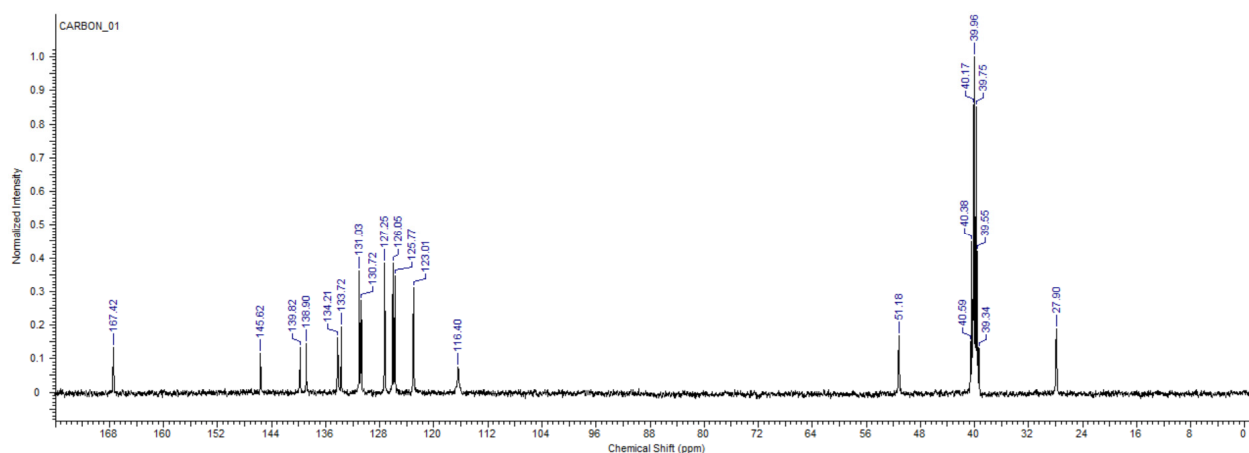

Title: \*ST-100 3428

Пн Ноя 07 12:46:22 2022 (G)

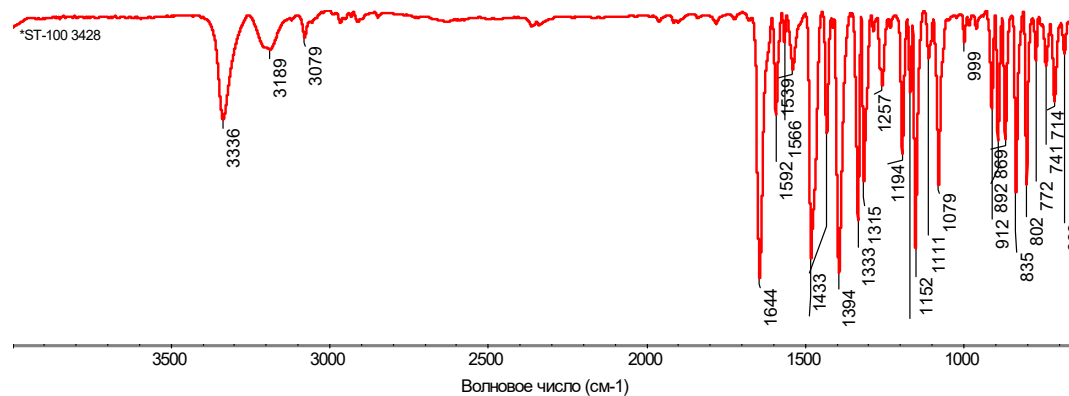

Expanded fingerprint region:

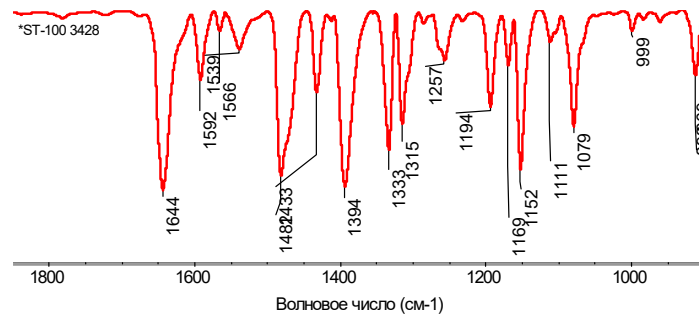

Время измерения: Пн Ноя 07 12:43:28 2022  
Число сканов пробы: 64  
Число сканов сравнения: 64  
Разрешение: 4.000  
Усиление: 8.0  
Скорость зеркала: 0.4747  
Диафрагма: 150.00

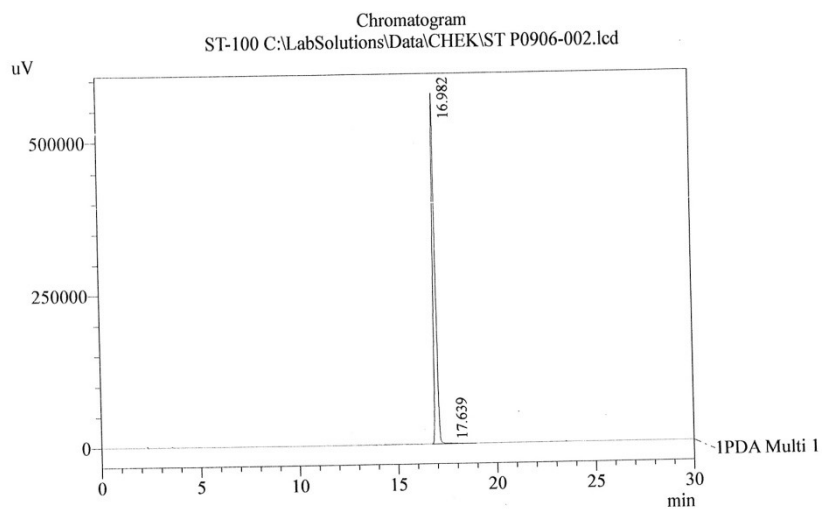

1 PDA Multi 1 / 300nm 4nm

PDA Ch1 300nm 4nm

| Peak# | Ret. Time | Area    | Height | Area %  |
|-------|-----------|---------|--------|---------|
| 1     | 16.982    | 5018288 | 574643 | 99.560  |
| 2     | 17.639    | 22195   | 1035   | 0.440   |
| Total |           | 5040483 | 575678 | 100.000 |

Method Filename : FOS B.lcm 06.10.2020 14:10:26

| Time  | Unit       | Command | Valu |
|-------|------------|---------|------|
| 0.01  | Pumps      | B.Conc  | 30   |
| 30.00 | Pumps      | B.Conc  | 70   |
| 33.00 | Pumps      | B.Conc  | 30   |
| 45.00 | Controller | Stop    |      |

Shimadzu LC-20 AD; System - FOS Colon- Kromasil-100-5mkm. C-18, 4,6x250 mm. N 62511  
Elution: A - H3PO4 0,01M pH 2,6; B - MeCN, fl - 1.0 ml/min, loop 20 mk1

# 1-(4-chlorobenzoyl)indoline-5-sulfonamide (4g)

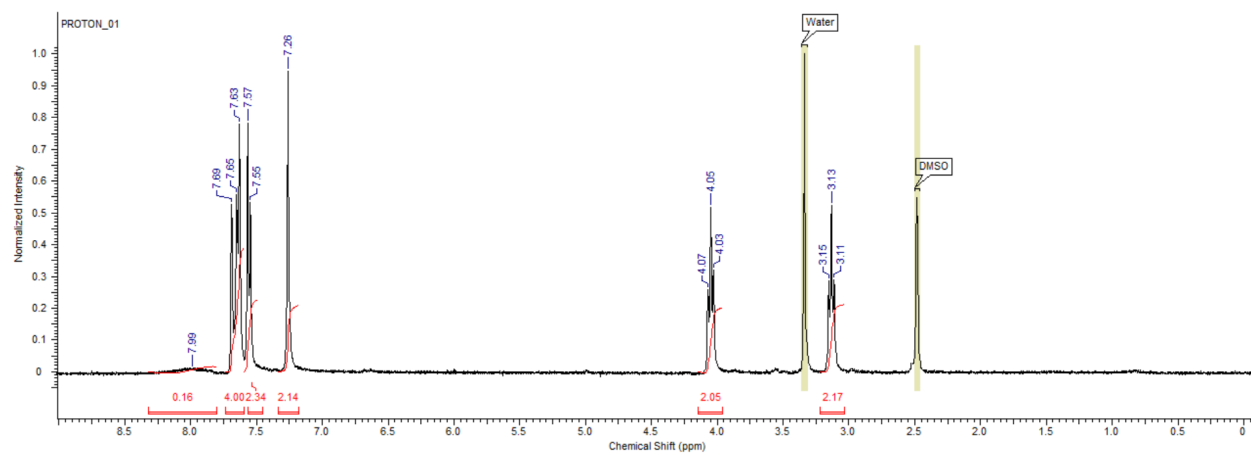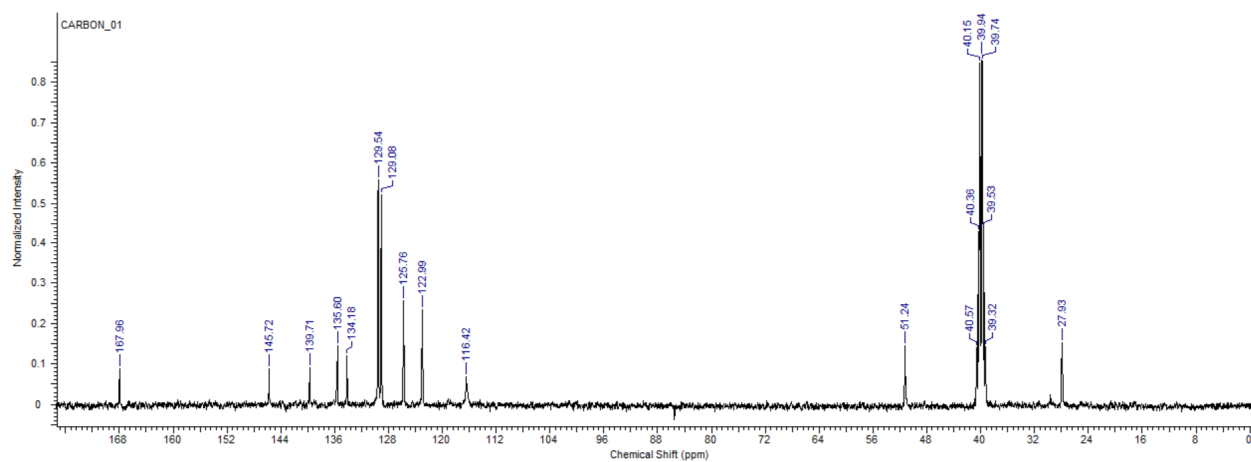

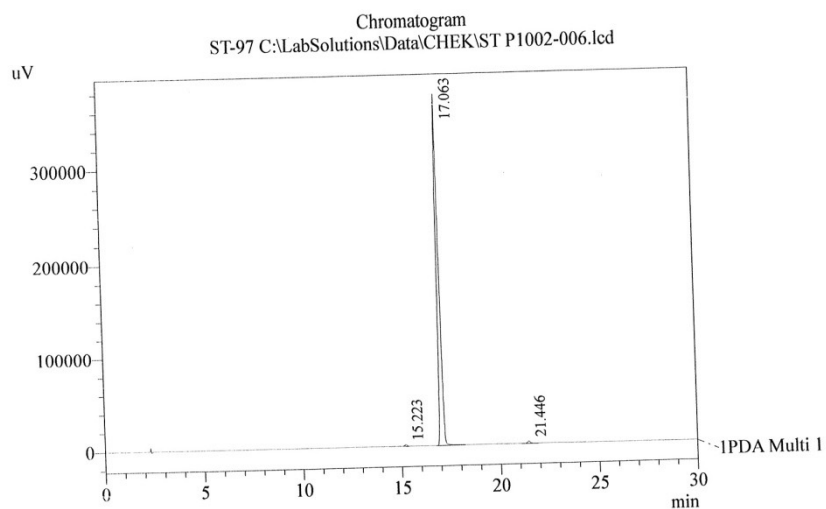

1 PDA Multi 1 / 300nm 4nm

PDA Ch1 300nm 4nm

| Peak# | Ret. Time | Area    | Height | Area %  |
|-------|-----------|---------|--------|---------|
| 1     | 15.223    | 13170   | 1606   | 0.405   |
| 2     | 17.063    | 3213095 | 374424 | 98.863  |
| 3     | 21.446    | 23791   | 2491   | 0.732   |
| Total |           | 3250056 | 378520 | 100.000 |

Method Filename : FOS B.lcm 05.10.2020 13:53:48

| Time  | Unit       | Command | Valu |
|-------|------------|---------|------|
| 0.01  | Pumps      | B.Conc  | 30   |
| 30.00 | Pumps      | B.Conc  | 70   |
| 33.00 | Pumps      | B.Conc  | 30   |
| 45.00 | Controller | Stop    |      |

Shimadzu LC-20 AD; System - FOS Colon- Kromasil-100-5mkm. C-18, 4,6x250 mm. N 62511  
Elution: A - H3PO4 0,01M pH 2,6; B - MeCN, fl - 1.0 ml/min, loop 20 mkl

# 1-(3,4-dichlorobenzoyl)indoline-5-sulfonamide (**4h**)

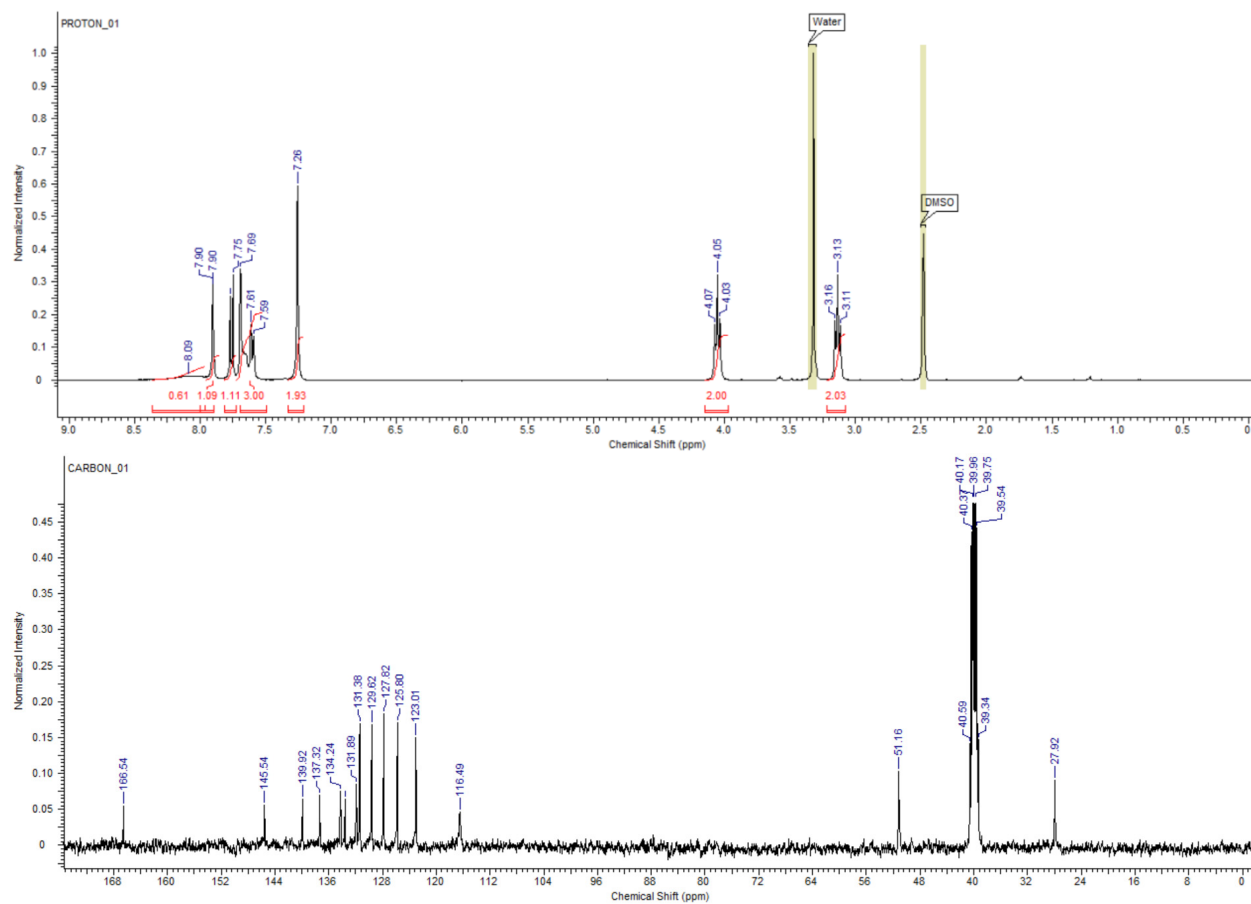

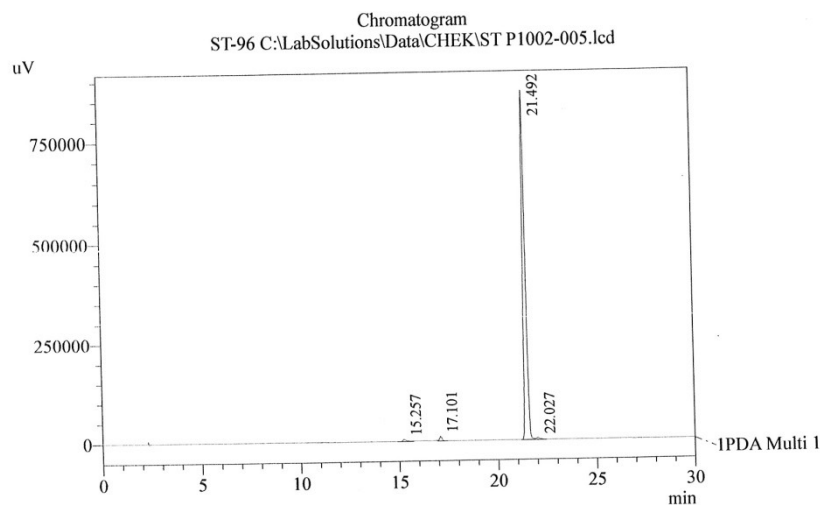

1 PDA Multi 1 / 300nm 4nm

PDA Ch1 300nm 4nm

| Peak# | Ret. Time | Area    | Height | Area %  |
|-------|-----------|---------|--------|---------|
| 1     | 15.257    | 66441   | 5083   | 0.778   |
| 2     | 17.101    | 96445   | 11095  | 1.129   |
| 3     | 21.492    | 8318492 | 869385 | 97.357  |
| 4     | 22.027    | 62979   | 4719   | 0.737   |
| Total |           | 8544356 | 890283 | 100.000 |

Method Filename : FOS B.lcm 05.10.2020 12:40:30

| Time  | Unit       | Command | Valu |
|-------|------------|---------|------|
| 0.01  | Pumps      | B.Conc  | 30   |
| 30.00 | Pumps      | B.Conc  | 70   |
| 33.00 | Pumps      | B.Conc  | 30   |
| 45.00 | Controller | Stop    |      |

Shimadzu LC-20 AD; System - FOS Colon- Kromasil-100-5mkm. C-18, 4,6x250 mm. N 62511  
Elution: A - H3PO4 0,01M pH 2,6; B - MeCN, fl - 1.0 ml/min, loop 20 mk1

# 1-(3-methylbenzoyl)indoline-5-sulfonamide (4i)

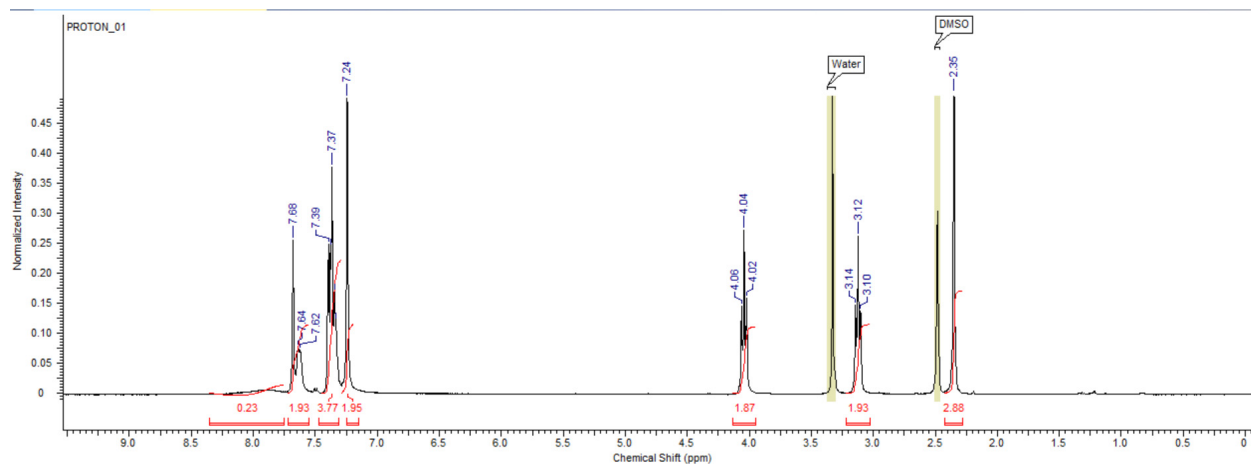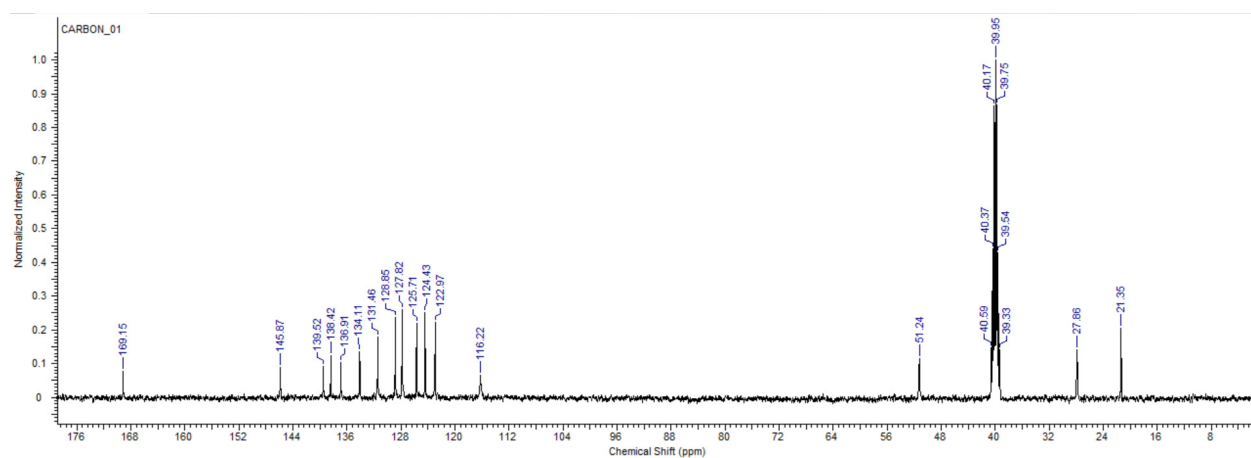

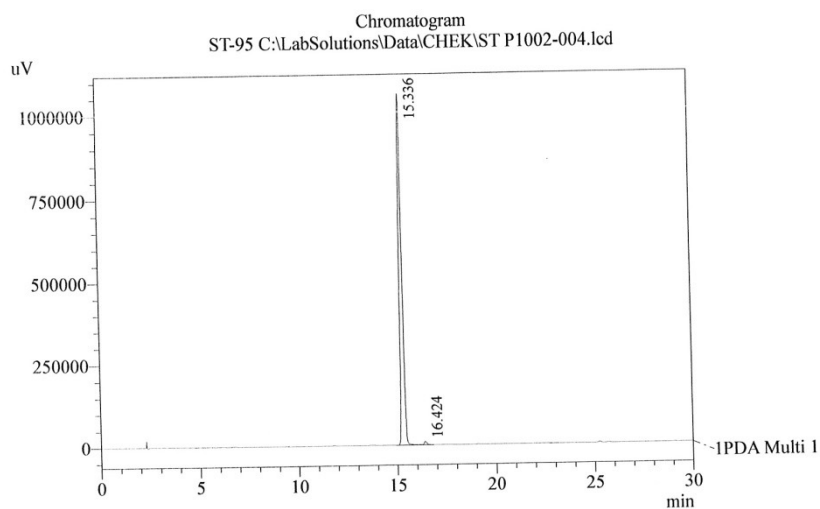

1 PDA Multi 1 / 300nm 4nm

PDA Ch1 300nm 4nm

| Peak# | Ret. Time | Area     | Height  | Area %  |
|-------|-----------|----------|---------|---------|
| 1     | 15.336    | 10702805 | 1061615 | 99.000  |
| 2     | 16.424    | 108055   | 9919    | 1.000   |
| Total |           | 10810860 | 1071534 | 100.000 |

Method Filename : FOS B.lcm 05.10.2020 11:52:51

| Time  | Unit       | Command | Valu |
|-------|------------|---------|------|
| 0.01  | Pumps      | B.Conc  | 30   |
| 30.00 | Pumps      | B.Conc  | 70   |
| 33.00 | Pumps      | B.Conc  | 30   |
| 45.00 | Controller | Stop    |      |

Shimadzu LC-20 AD; System - FOS Colon- Kromasil-100-5mkm. C-18, 4,6x250 mm. N 62511  
Elution: A - H3PO4 0,01M pH 2,6; B - MeCN, fl - 1.0 ml/min, loop 20 mk1

# 1-(3-methoxybenzoyl)indoline-5-sulfonamide (**4j**)

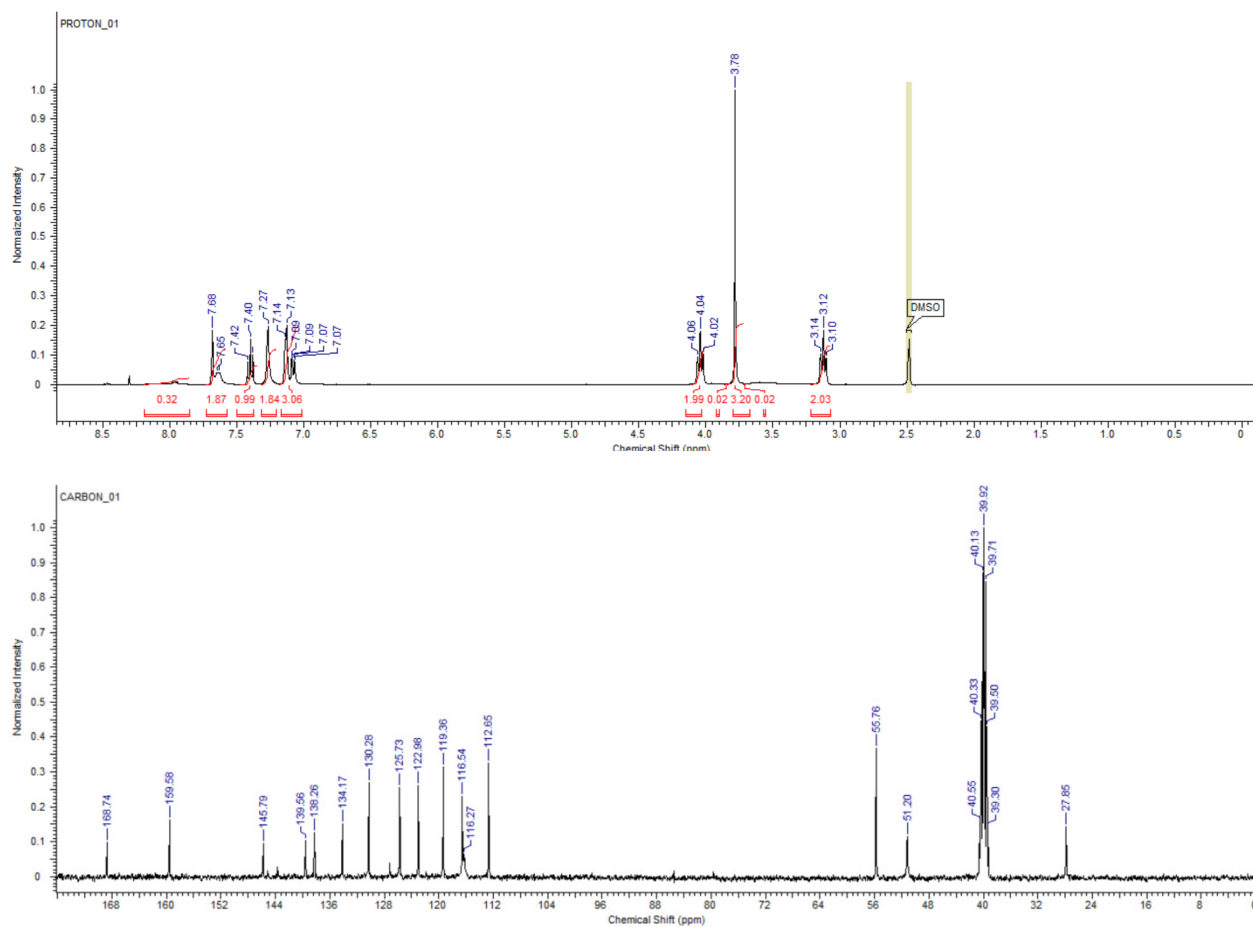

Chromatogram  
ST-103 C:\LabSolutions\Data\CHEK\ST P1030-02.lcd

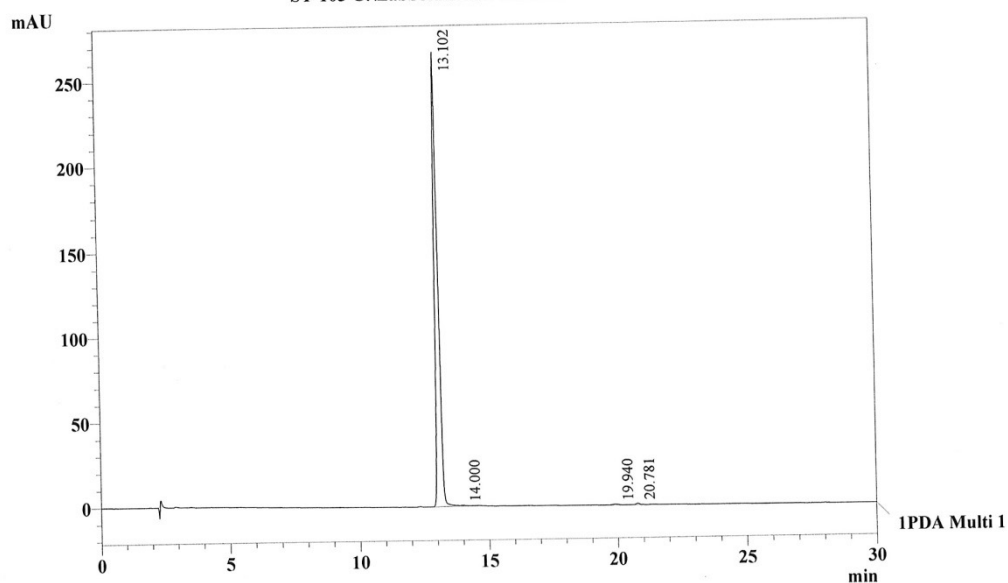

1 PDA Multi 1 / 300nm 4nm

PeakTable

PDA Ch1 300nm 4nm

| Peak# | Ret. Time | Area    | Height | Area %  |
|-------|-----------|---------|--------|---------|
| 1     | 13.102    | 2411337 | 267365 | 99.038  |
| 2     | 14.000    | 9469    | 434    | 0.389   |
| 3     | 19.940    | 6510    | 417    | 0.267   |
| 4     | 20.781    | 7454    | 834    | 0.306   |
| Total |           | 2434770 | 269050 | 100.000 |

Method

<<LC Program>>

| Time  | Unit       | Command | Value |
|-------|------------|---------|-------|
| 0.10  | Pumps      | B.Conc  | 30    |
| 30.00 | Pumps      | B.Conc  | 70    |
| 33.00 | Pumps      | B.Conc  | 30    |
| 45.00 | Controller | Stop    |       |

Method Filename : FOS B.lcm

Shimadzu LC-20AD; 2-System FOS, Colon Kromasil 100-C18,,size 5mk, 4,6\*250mm, N 86912  
Elution: A - H3PO4 0.01M pH 2.6; B - MeCN, fl. 1,0 ml/min, loop 20mk.

# 1-(4-methoxybenzoyl)indoline-5-sulfonamide (4k)

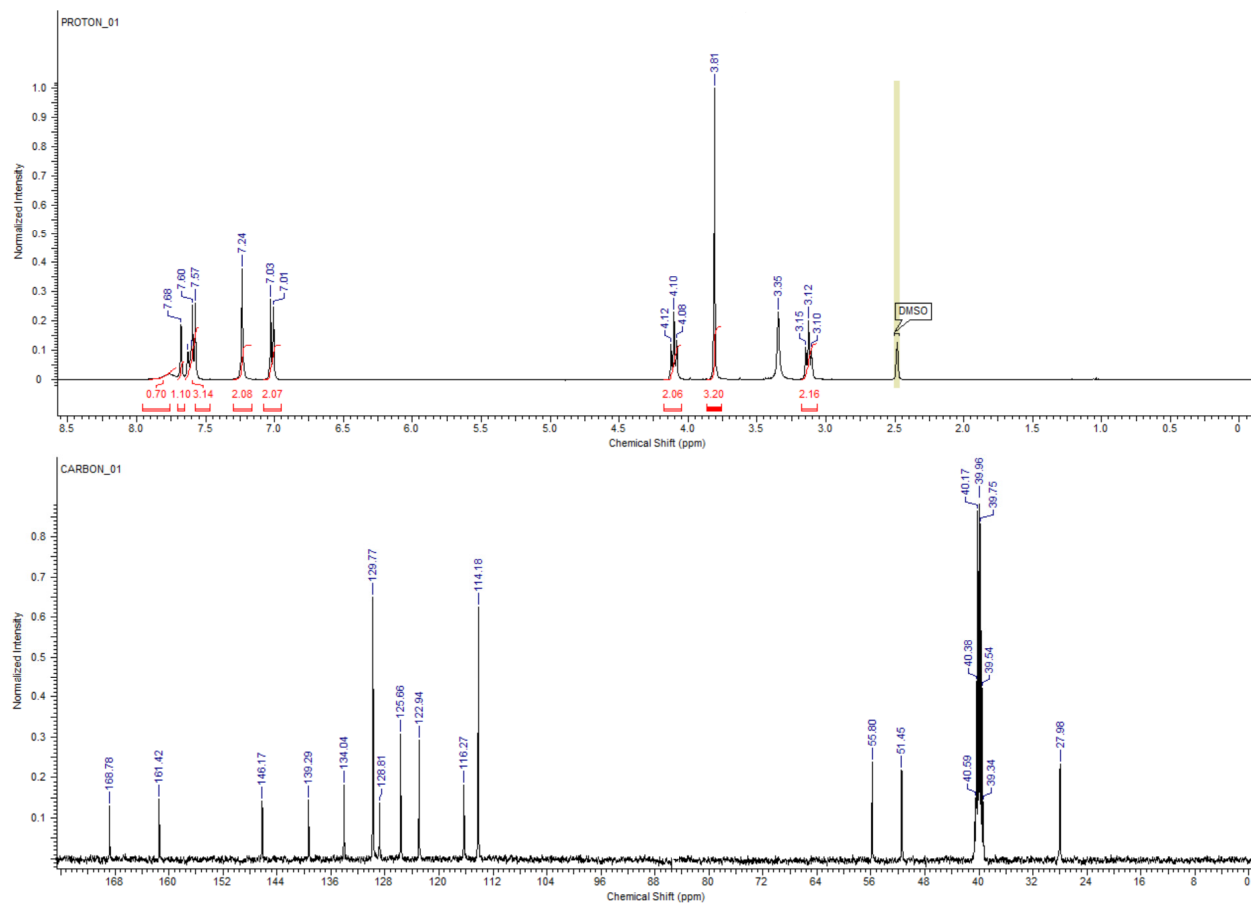

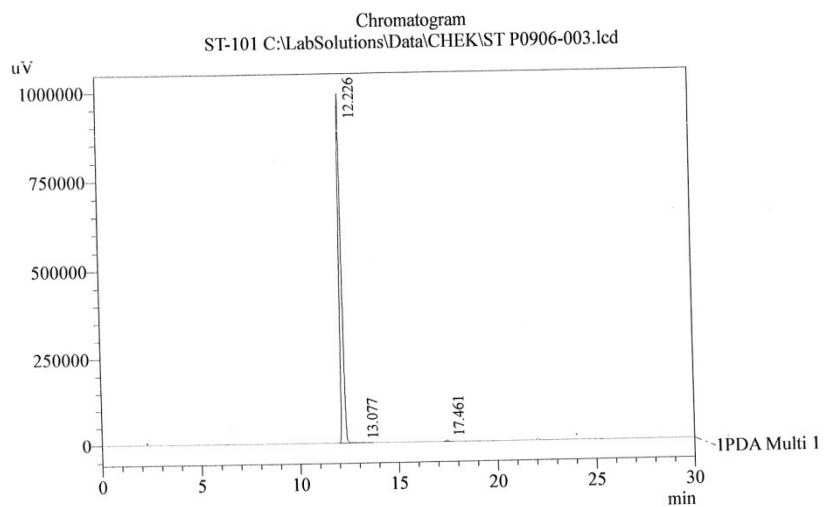

1 PDA Multi 1 / 300nm 4nm

PDA Ch1 300nm 4nm

| Peak# | Ret. Time | Area    | Height | Area %  |
|-------|-----------|---------|--------|---------|
| 1     | 12.226    | 8740989 | 992449 | 99.528  |
| 2     | 13.077    | 6703    | 418    | 0.076   |
| 3     | 17.461    | 34730   | 4455   | 0.395   |
| Total |           | 8782421 | 997321 | 100.000 |

Method Filename : FOS B.lcm 06.10.2020 14:50:25

| Time  | Unit       | Command | Valu |
|-------|------------|---------|------|
| 0.01  | Pumps      | B.Conc  | 30   |
| 30.00 | Pumps      | B.Conc  | 70   |
| 33.00 | Pumps      | B.Conc  | 30   |
| 45.00 | Controller | Stop    |      |

Shimadzu LC-20 AD; System - FOS Colon- Kromasil-100-5mk. C-18, 4,6x250 mm. N 62511  
Elution: A - H3PO4 0,01M pH 2,6; B - MeCN, fl - 1.0 ml/min, loop 20 mkl

# 1-(2,4-dimethoxybenzoyl)indoline-5-sulfonamide (**4l**)

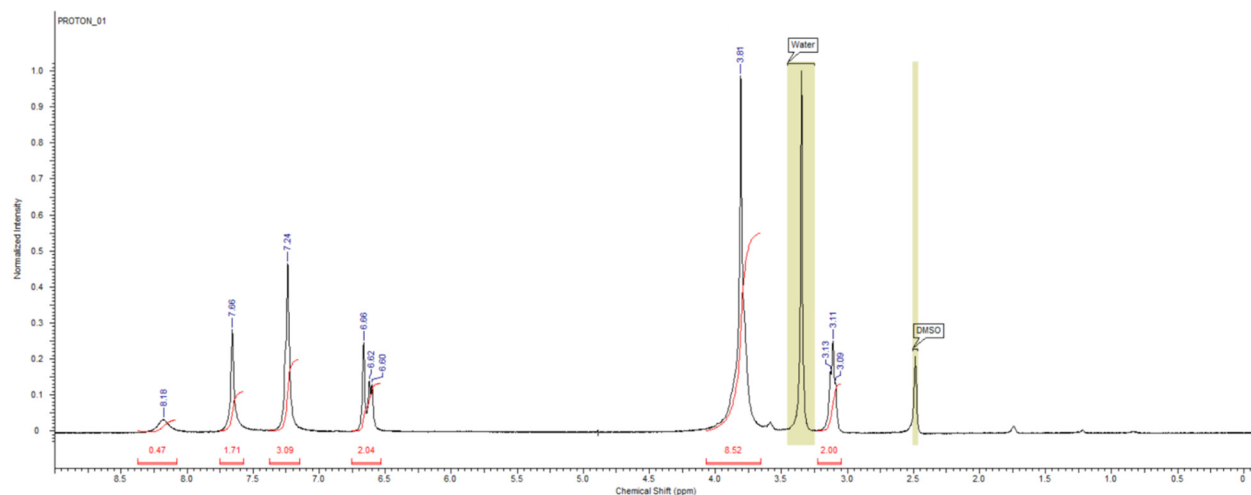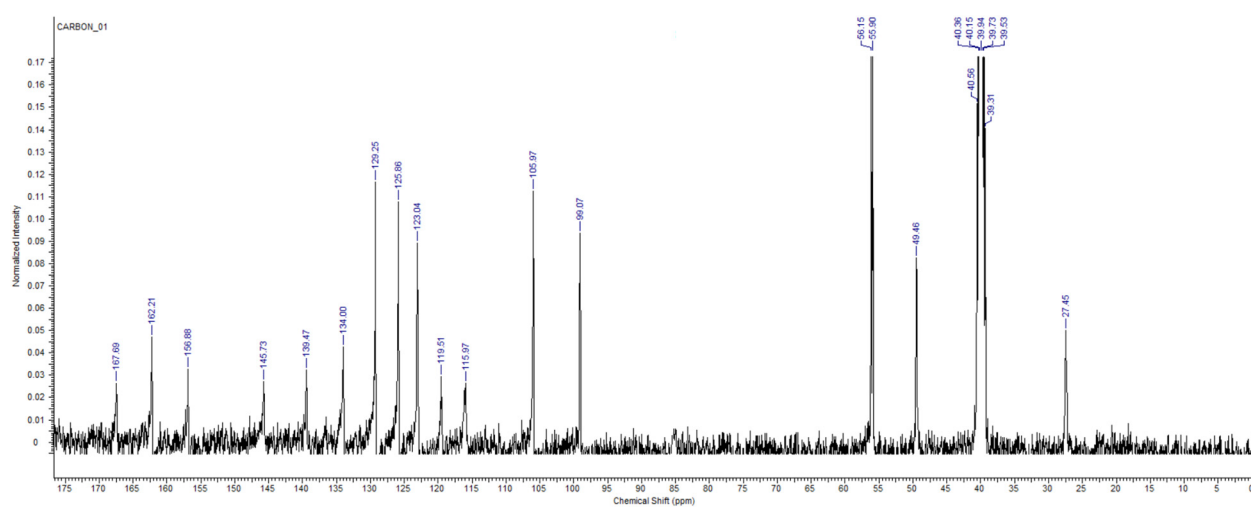

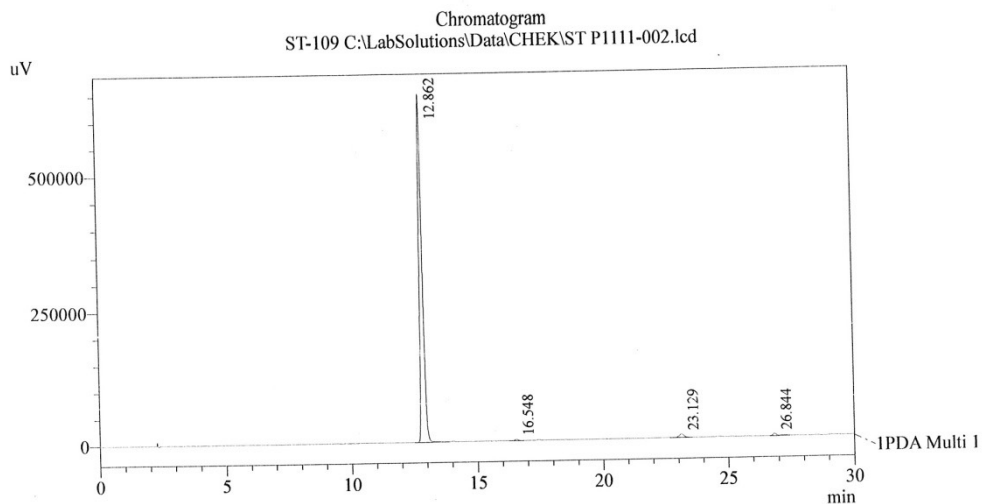

1 PDA Multi 1 / 300nm 4nm

PDA Ch1 300nm 4nm

| Peak# | Ret. Time | Area    | Height | Area %  |
|-------|-----------|---------|--------|---------|
| 1     | 12.862    | 5746904 | 647802 | 97.111  |
| 2     | 16.548    | 23329   | 2575   | 0.394   |
| 3     | 23.129    | 94185   | 6712   | 1.592   |
| 4     | 26.844    | 53446   | 4094   | 0.903   |
| Total |           | 5917864 | 661183 | 100.000 |

Method Filename : FOS B.lcm 11.11.2020 13:56:50

| Time  | Unit       | Command | Valu |
|-------|------------|---------|------|
| 0.01  | Pumps      | B.Conc  | 30   |
| 30.00 | Pumps      | B.Conc  | 70   |
| 33.00 | Pumps      | B.Conc  | 30   |
| 45.00 | Controller | Stop    |      |

Shimadzu LC-20 AD; System - FOS Colon- Kromasil-100-5mkm. C-18, 4,6x250 mm. N 62511  
Elution: A - H3PO4 0,01M pH 2,6; B - MeCN, fl - 1.0 ml/min, loop 20 mkl

# 1-(3,4,5-trimethoxybenzoyl)indoline-5-sulfonamide (**4m**)

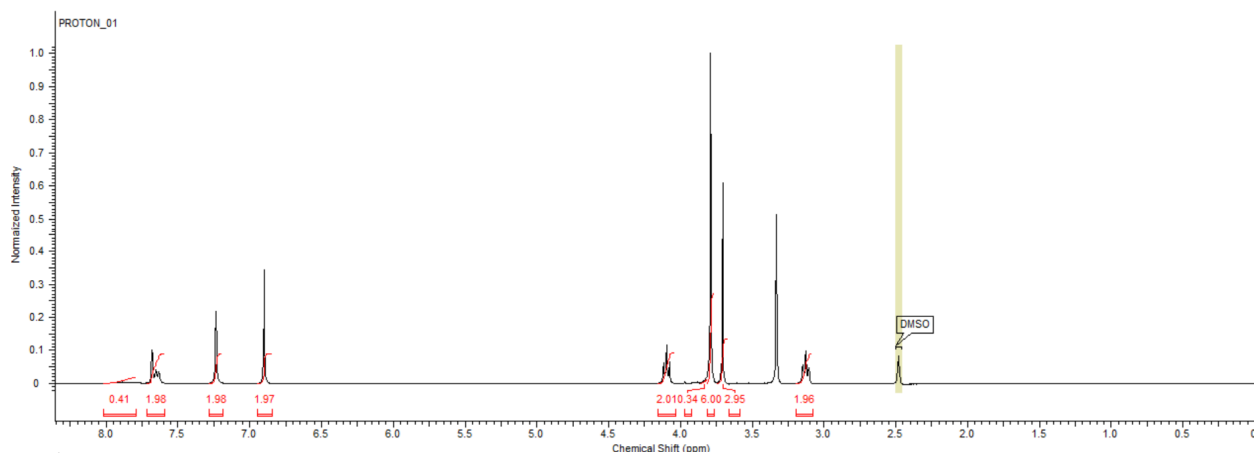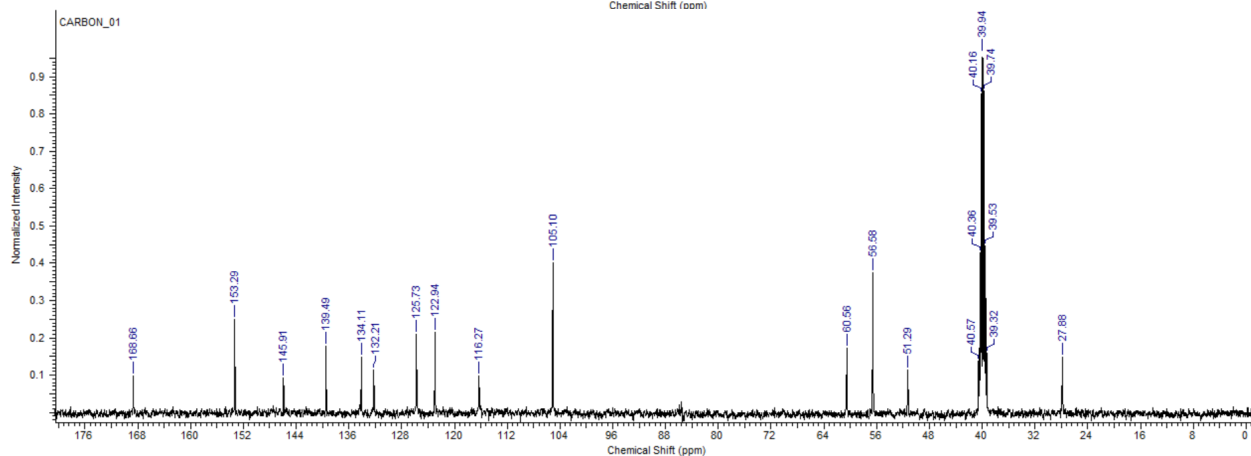

Title: \*ST102 3430

Пн Ноя 07 12:07:49 2022 (G)

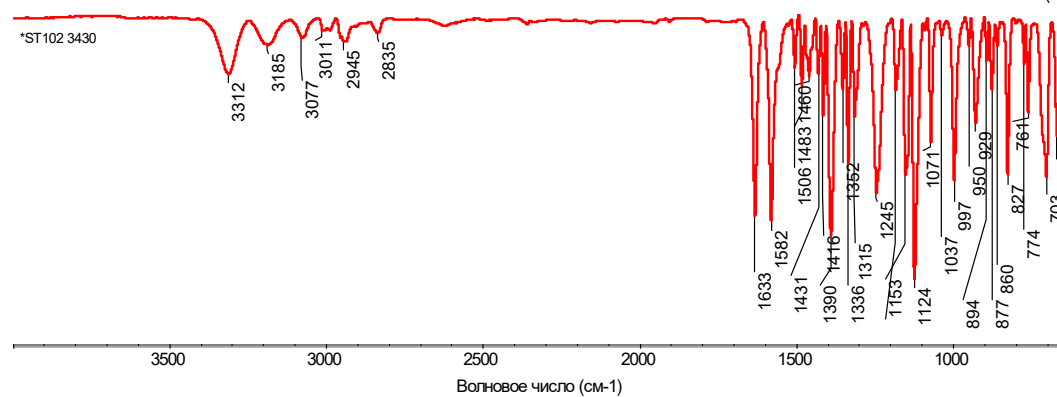

Expanded fingerprint region:

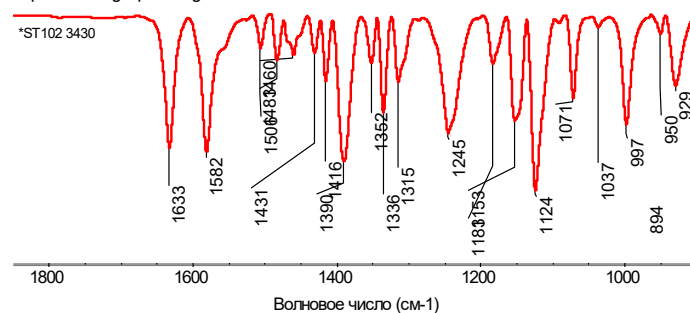

Время измерения: Пн Ноя 07 12:02:47 2022  
 Число сканов пробы: 64  
 Число сканов сравнения: 64  
 Разрешение: 4.000  
 Усиление: 8.0  
 Скорость зеркала: 0.4747  
 Диафрагма: 150.00

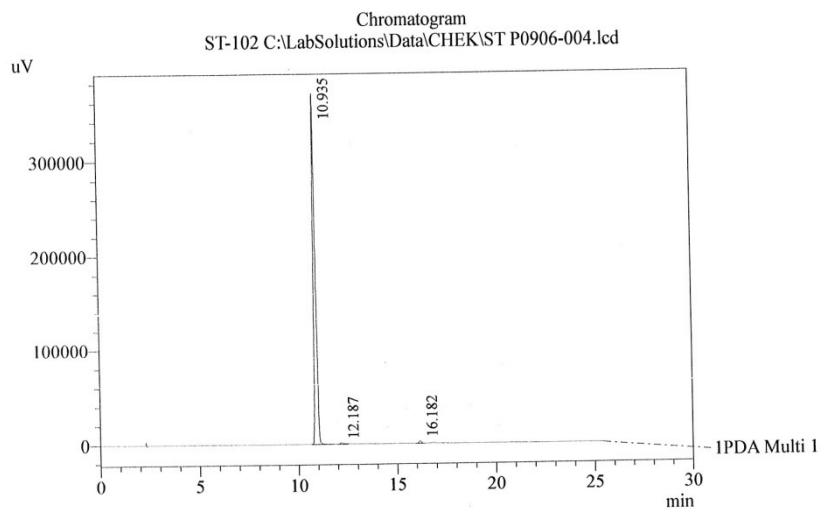

1 PDA Multi 1 / 300nm 4nm

PDA Ch1 300nm 4nm

| Peak# | Ret. Time | Area    | Height | Area %  |
|-------|-----------|---------|--------|---------|
| 1     | 10.935    | 2964625 | 369482 | 98.569  |
| 2     | 12.187    | 20123   | 1367   | 0.669   |
| 3     | 16.182    | 22931   | 2533   | 0.762   |
| Total |           | 3007679 | 373382 | 100.000 |

Method Filename : FOS B.lcm 06.10.2020 15:38:53

| Time  | Unit       | Command | Valu |
|-------|------------|---------|------|
| 0.01  | Pumps      | B.Conc  | 30   |
| 30.00 | Pumps      | B.Conc  | 70   |
| 33.00 | Pumps      | B.Conc  | 30   |
| 45.00 | Controller | Stop    |      |

Shimadzu LC-20 AD; System - FOS Colon- Kromasil-100-5mk. C-18, 4,6x250 mm. N 62511  
Elution: A - H3PO4 0,01M pH 2,6; B - MeCN, fl - 1.0 ml/min, loop 20 mkl

# 1-(4-(methylthio)benzoyl)indoline-5-sulfonamide (**4n**)

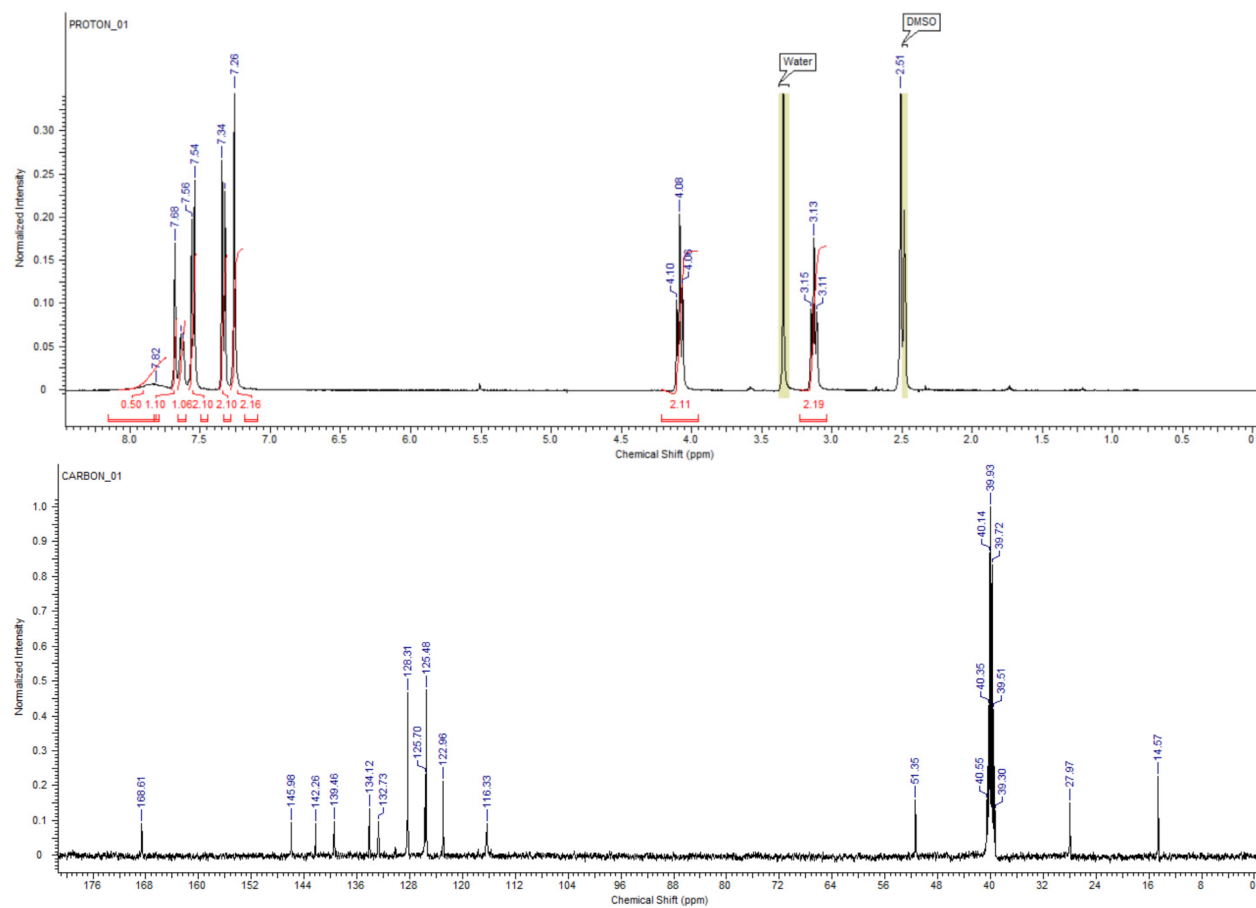

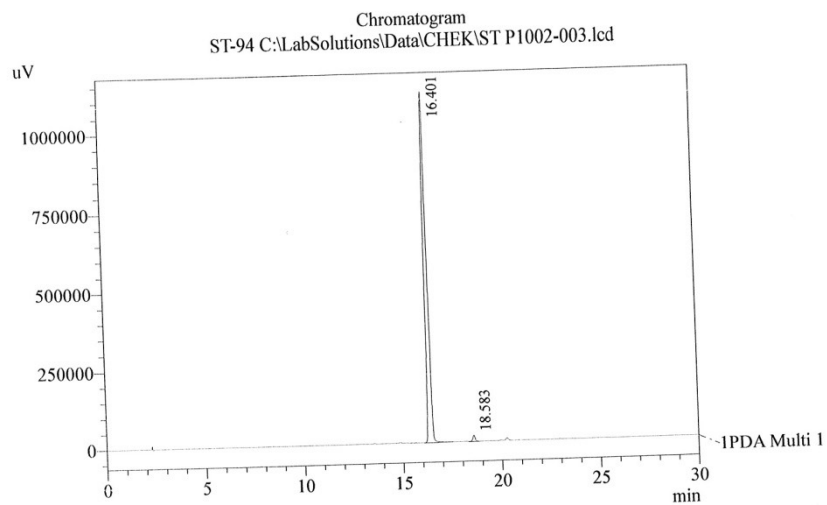

1 PDA Multi 1 / 300nm 4nm

PDA Ch1 300nm 4nm

| Peak# | Ret. Time | Area     | Height  | Area %  |
|-------|-----------|----------|---------|---------|
| 1     | 16.401    | 11220008 | 1115012 | 98.577  |
| 2     | 18.583    | 161929   | 19590   | 1.423   |
| Total |           | 11381937 | 1134602 | 100.000 |

Method Filename : FOS B.lcm 02.10.2020 14:57:52

| Time  | Unit       | Command | Value |
|-------|------------|---------|-------|
| 0.01  | Pumps      | B.Conc  | 30    |
| 30.00 | Pumps      | B.Conc  | 70    |
| 33.00 | Pumps      | B.Conc  | 30    |
| 45.00 | Controller | Stop    |       |

Shimadzu LC-20 AD; System - FOS Colon- Kromasil-100-5mkm. C-18, 4,6x250 mm. N 62511  
Elution: A - H3PO4 0,01M pH 2,6; B - MeCN, fl - 1.0 ml/min, loop 20 mkl

# 1-(2-nitrobenzoyl)indoline-5-sulfonamide (**4o**)

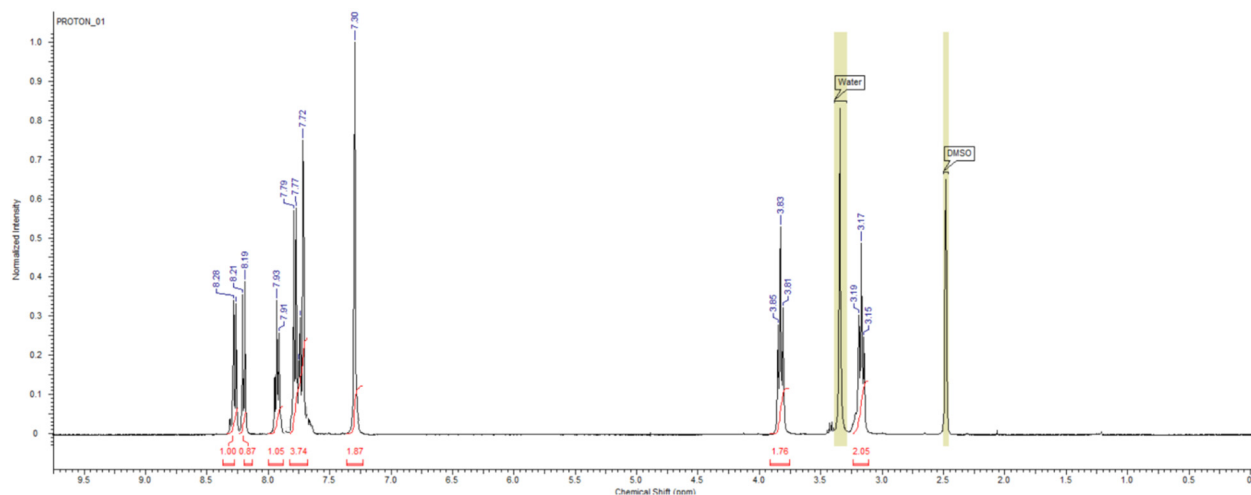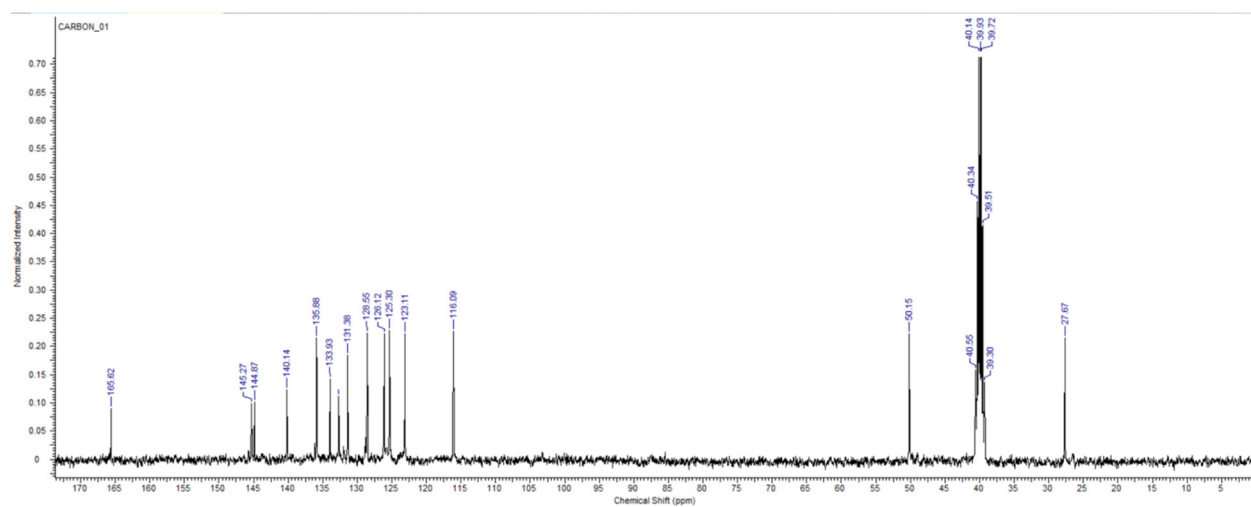

Chromatogram  
ST-104 C:\LabSolutions\Data\CHEK\ST P1125-05.lcd

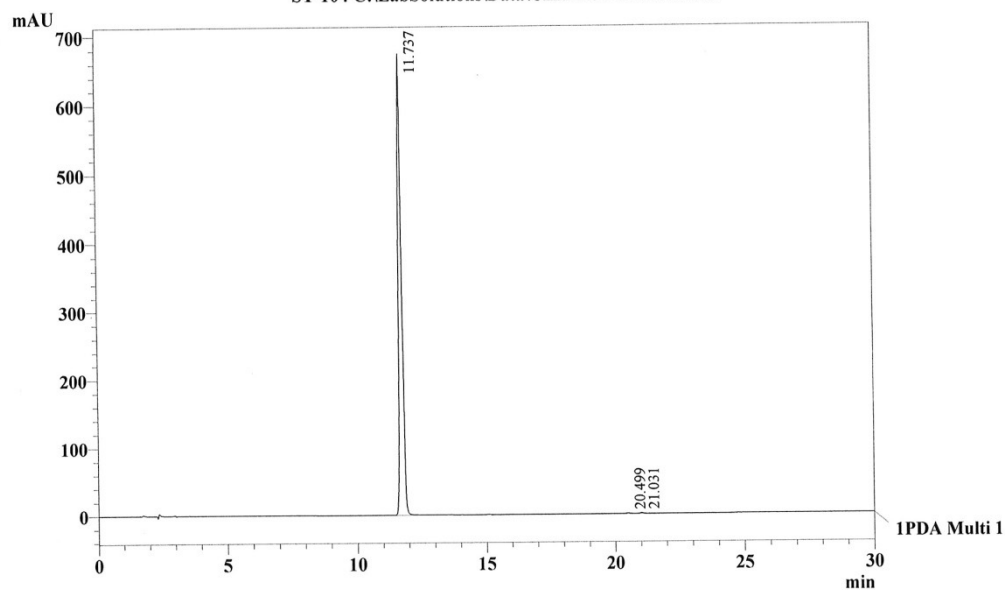

1 PDA Multi 1 / 270nm 4nm

PeakTable

PDA Ch1 270nm 4nm

| Peak# | Ret. Time | Area    | Height | Area %  |
|-------|-----------|---------|--------|---------|
| 1     | 11.737    | 5937221 | 674277 | 99.774  |
| 2     | 20.499    | 5545    | 637    | 0.093   |
| 3     | 21.031    | 7886    | 912    | 0.133   |
| Total |           | 5950653 | 675825 | 100.000 |

Method

<<LC Program>>

| Time  | Unit       | Command | Value |
|-------|------------|---------|-------|
| 0.10  | Pumps      | B.Conc  | 30    |
| 30.00 | Pumps      | B.Conc  | 70    |
| 33.00 | Pumps      | B.Conc  | 30    |
| 45.00 | Controller | Stop    |       |

Method Filename : FOS B.lcm

Shimadzu LC-20AD; 2-System FOS, Colon Kromasil 100-C18,.size 5mkm, 4,6\*250mm, N 86912  
Elution: A - H3PO4 0.01M pH 2.6; B - MeCN, fl. 1,0 ml/min, loop 20mkl.

# 1-(4-nitrobenzoyl)indoline-5-sulfonamide (**4p**)

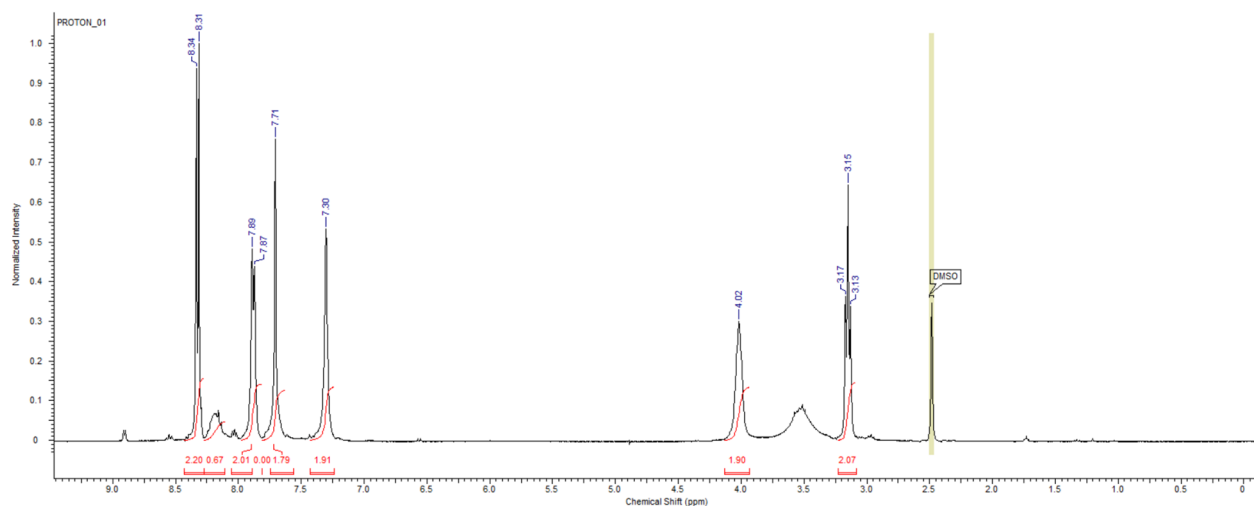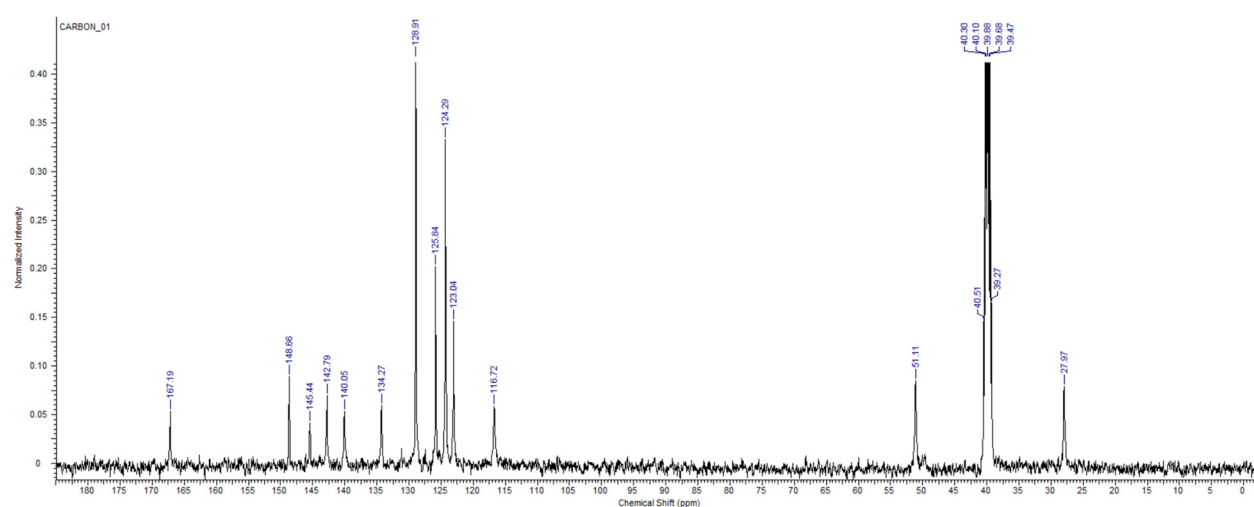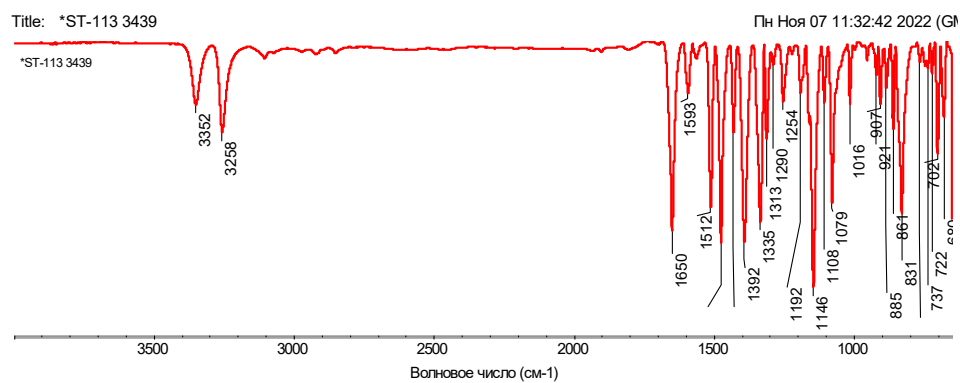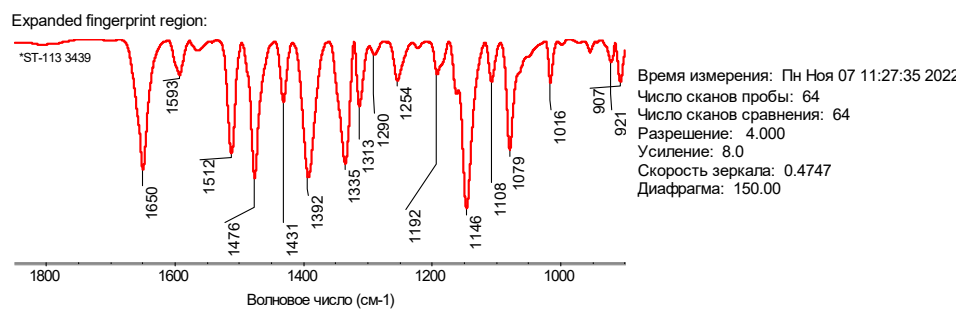

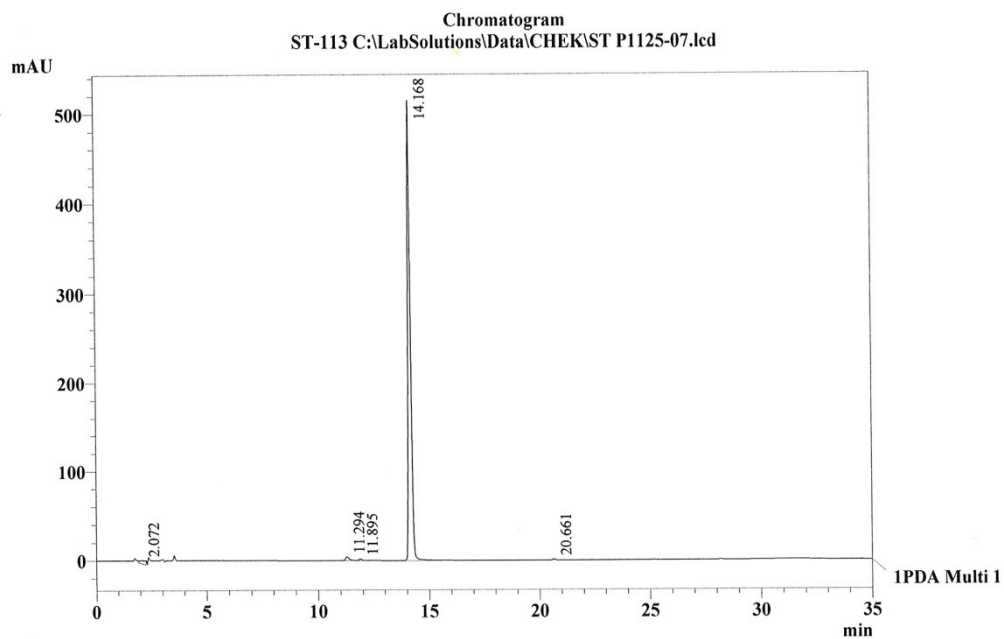

1 PDA Multi 1 / 270nm 4nm

PeakTable

PDA Ch1 270nm 4nm

| Peak# | Ret. Time | Area    | Height | Area %  |
|-------|-----------|---------|--------|---------|
| 1     | 2.072     | 64301   | 3435   | 1.427   |
| 2     | 11.294    | 39543   | 3815   | 0.878   |
| 3     | 11.895    | 13608   | 1563   | 0.302   |
| 4     | 14.168    | 4378896 | 515492 | 97.212  |
| 5     | 20.661    | 8123    | 1032   | 0.180   |
| Total |           | 4504471 | 525337 | 100.000 |

Method

<<LC Program>>

| Time  | Unit       | Command | Value |
|-------|------------|---------|-------|
| 0.10  | Pumps      | B.Conc  | 30    |
| 30.00 | Pumps      | B.Conc  | 70    |
| 33.00 | Pumps      | B.Conc  | 30    |
| 45.00 | Controller | Stop    |       |

Method Filename : FOS B.lcm

Shimadzu LC-20AD; 2-System FOS, Colon Kromasil 100-C18, size 5mk, 4,6\*250mm, N 86912  
Elution: A - H3PO4 0.01M pH 2.6; B - MeCN, fl. 1,0 ml/min, loop 20mk.

# 1-isonicotinoylindoline-5-sulfonamide (4q)

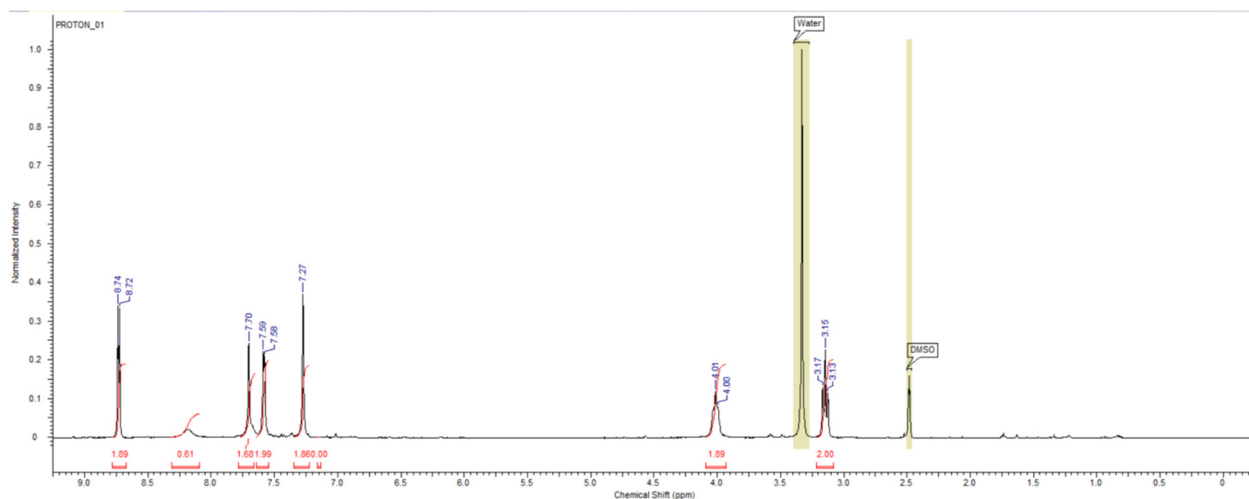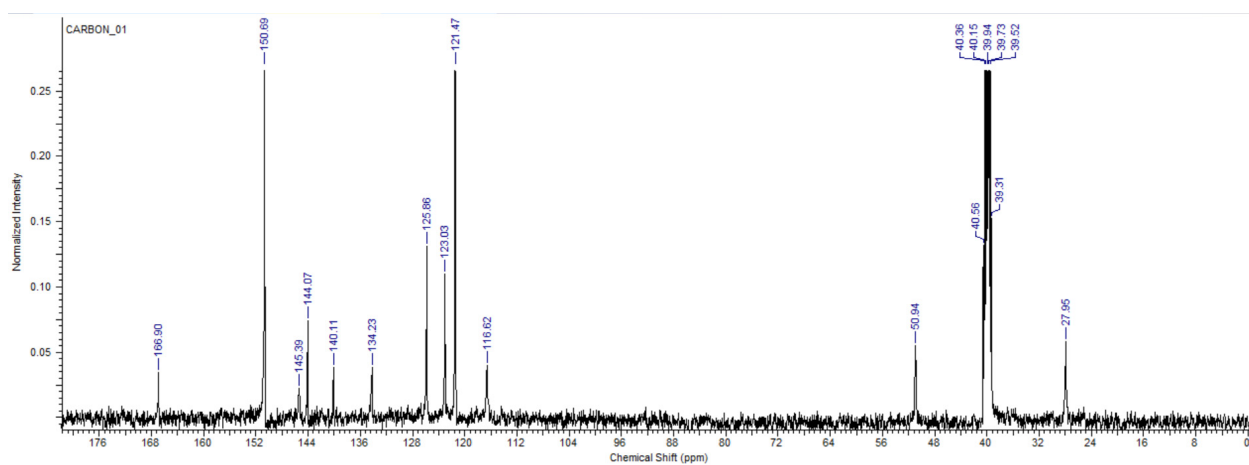

Title: \*ST-111 3437

Пн Ноя 07 11:18:14 2022 (G)

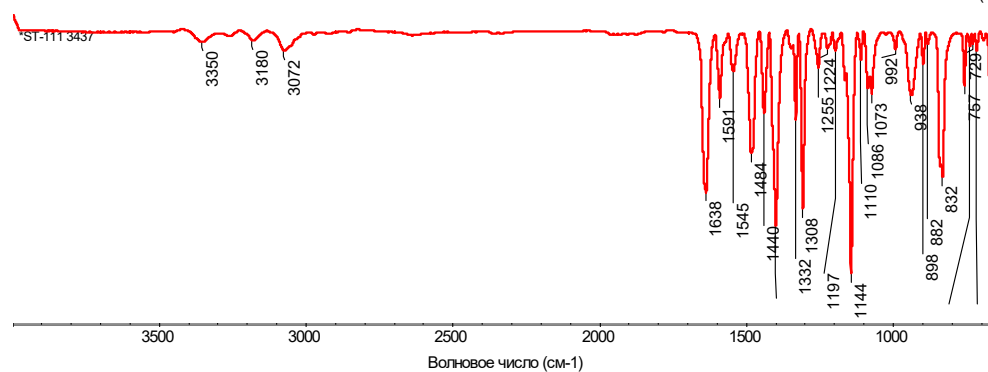

Expanded fingerprint region:

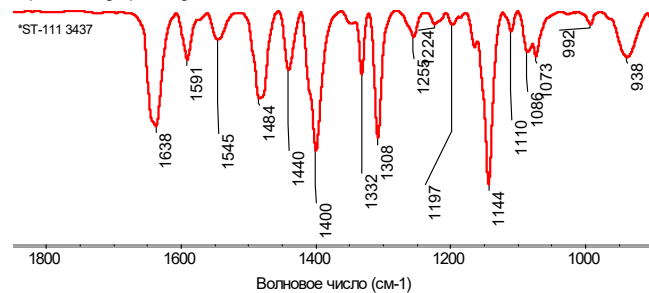

Время измерения: Пн Ноя 07 11:13:20 2022  
Число сканов пробы: 64  
Число сканов сравнения: 64  
Разрешение: 4.000  
Усиление: 8.0  
Скорость зеркала: 0.4747  
Диафрагма: 150.00

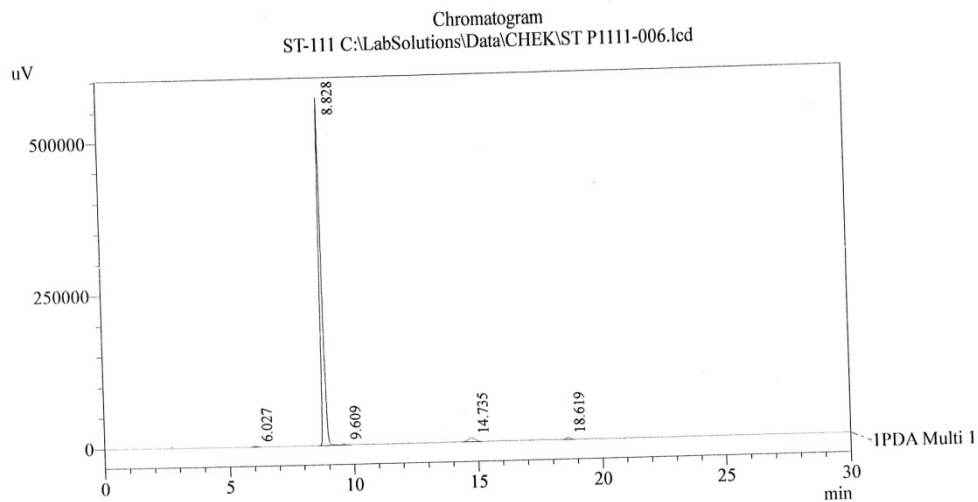

1 PDA Multi 1 / 260nm 4nm

PDA Ch1 260nm 4nm

| Peak# | Ret. Time | Area    | Height | Area %  |
|-------|-----------|---------|--------|---------|
| 1     | 6.027     | 12194   | 1616   | 0.290   |
| 2     | 8.828     | 4009315 | 569775 | 95.491  |
| 3     | 9.609     | 15424   | 1983   | 0.367   |
| 4     | 14.735    | 124637  | 6441   | 2.969   |
| 5     | 18.619    | 37066   | 3580   | 0.883   |
| Total |           | 4198636 | 583394 | 100.000 |

Method Filename : FOS B.lcm 12.11.2020 12:18:15

| Time  | Unit       | Command | Valu |
|-------|------------|---------|------|
| 0.01  | Pumps      | B.Conc  | 10   |
| 30.00 | Pumps      | B.Conc  | 50   |
| 33.00 | Pumps      | B.Conc  | 10   |
| 45.00 | Controller | Stop    |      |

Shimadzu LC-20 AD; System - FOS Colon- Kromasil-100-5mkm. C-18, 4,6x250 mm. N 62511  
Elution: A - H3PO4 0,01M pH 2,6; B - MeCN, fl - 1.0 ml/min, loop 20 mkl

1-(thiophene-2-carbonyl)indoline-5-sulfonamide (**4r**)

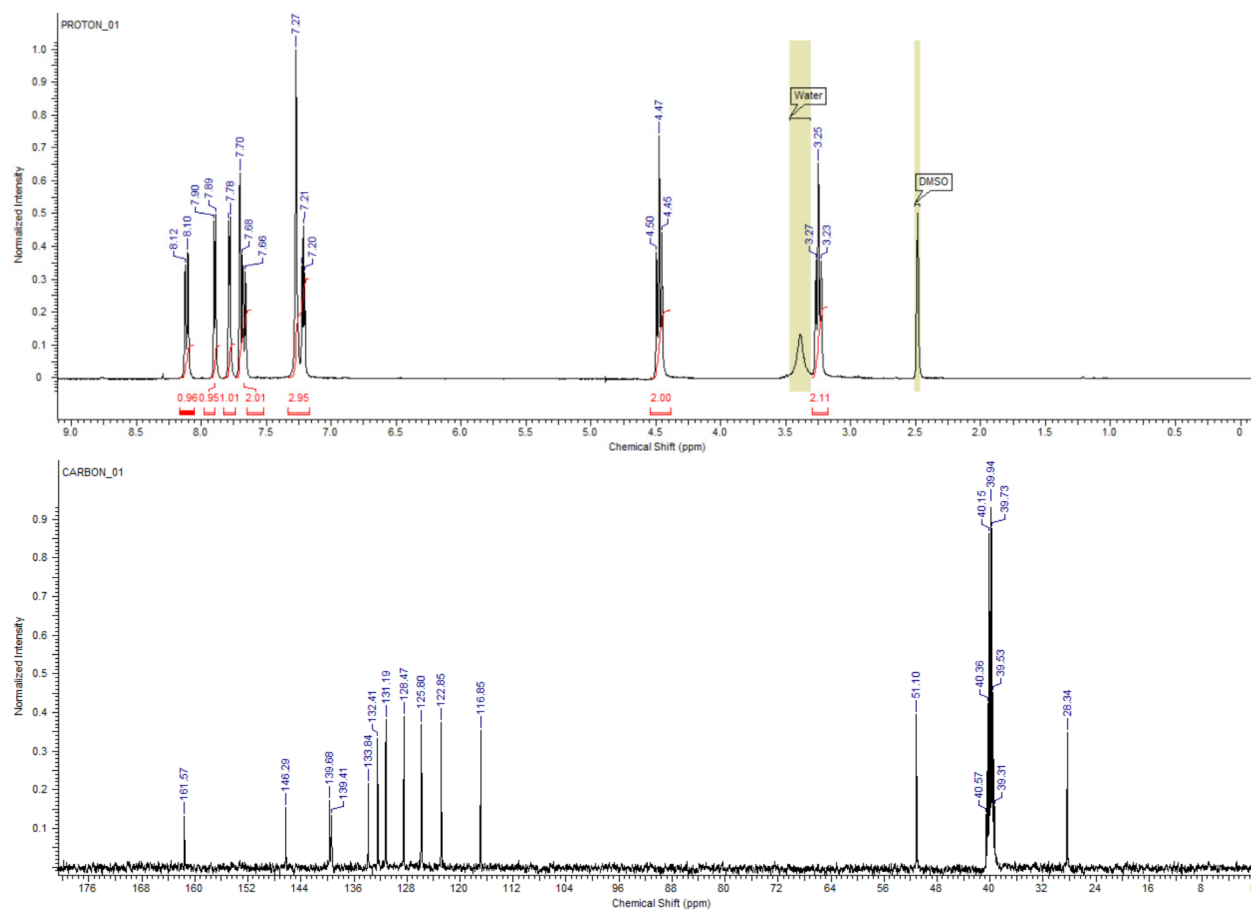

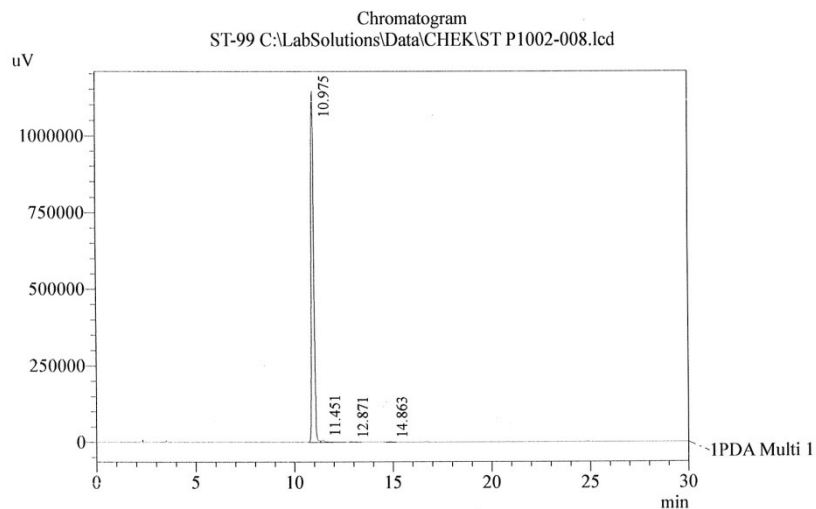

1 IPDA Multi 1 / 300nm 4nm

PDA Ch1 300nm 4nm

| Peak# | Ret. Time | Area     | Height  | Area %  |
|-------|-----------|----------|---------|---------|
| 1     | 10.975    | 11010663 | 1143769 | 98.850  |
| 2     | 11.451    | 94362    | 7117    | 0.847   |
| 3     | 12.871    | 18831    | 1116    | 0.169   |
| 4     | 14.863    | 14933    | 1719    | 0.134   |
| Total |           | 11138790 | 1153721 | 100.000 |

Method Filename : FOS B.lcm 05.10.2020 15:33:15

| Time  | Unit       | Command | Valu |
|-------|------------|---------|------|
| 0.01  | Pumps      | B.Conc  | 30   |
| 30.00 | Pumps      | B.Conc  | 70   |
| 33.00 | Pumps      | B.Conc  | 30   |
| 45.00 | Controller | Stop    |      |

Shimadzu LC-20 AD; System - FOS Colon- Kromasil-100-5mk. C-18, 4,6x250 mm. N 62511  
Elution: A - H<sub>3</sub>PO<sub>4</sub> 0,01M pH 2,6; B - MeCN, fl - 1.0 ml/min, loop 20 mkl

# 1-(cyclopentanecarbonyl)indoline-5-sulfonamide (**4s**)

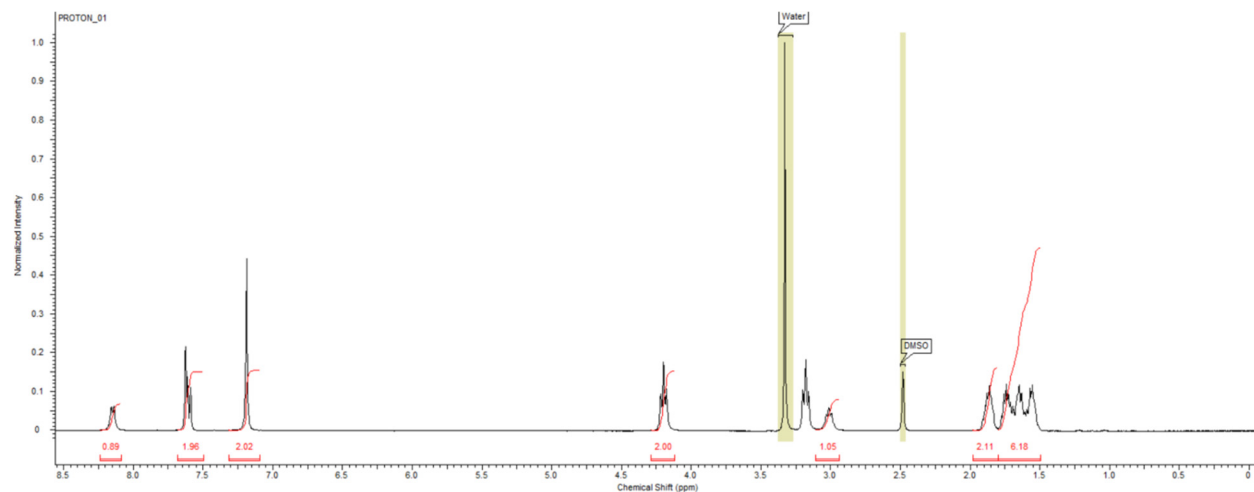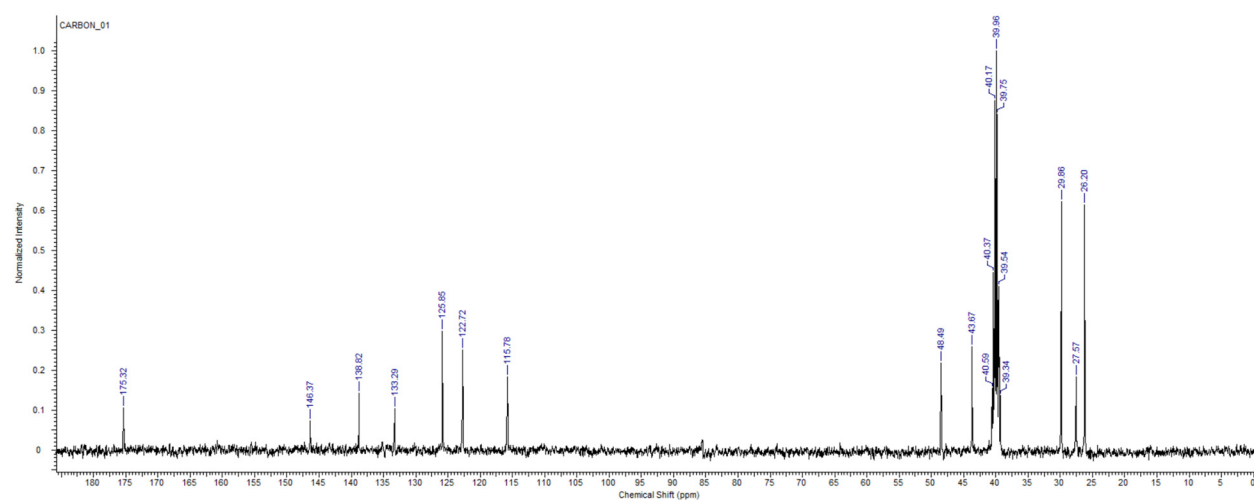

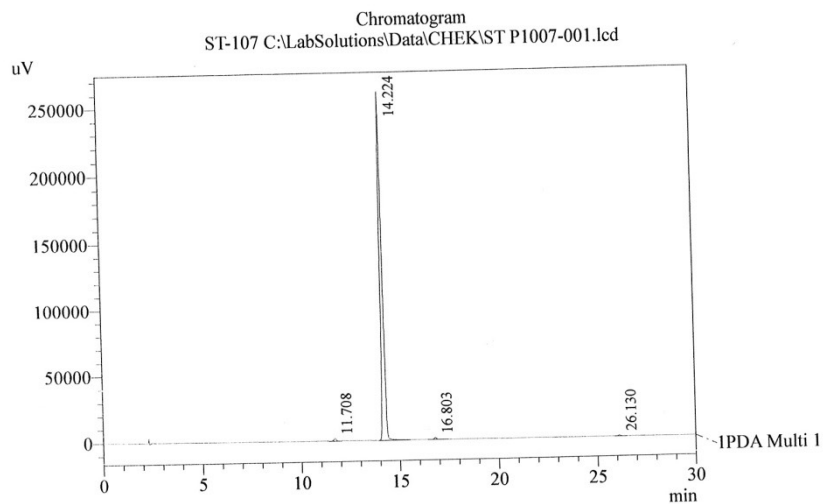

1 PDA Multi 1 / 300nm 4nm

PDA Ch1 300nm 4nm

| Peak# | Ret. Time | Area    | Height | Area %  |
|-------|-----------|---------|--------|---------|
| 1     | 11.708    | 14481   | 1913   | 0.638   |
| 2     | 14.224    | 2238145 | 261015 | 98.644  |
| 3     | 16.803    | 9786    | 1350   | 0.431   |
| 4     | 26.130    | 6491    | 758    | 0.286   |
| Total |           | 2268904 | 265037 | 100.000 |

Method Filename : FOS B.lcm 07.10.2020 14:29:08

| Time  | Unit       | Command | Valu |
|-------|------------|---------|------|
| 0.01  | Pumps      | B.Conc  | 30   |
| 30.00 | Pumps      | B.Conc  | 70   |
| 33.00 | Pumps      | B.Conc  | 30   |
| 45.00 | Controller | Stop    |      |

Shimadzu LC-20 AD; System - FOS Colon- Kromasil-100-5mkm. C-18, 4,6x250 mm. N 62511  
Elution: A - H3PO4 0,01M pH 2,6; B - MeCN, fl - 1.0 ml/min, loop 20 mkl

# 1-(2-cyclopentylacetyl)indoline-5-sulfonamide (**4t**)

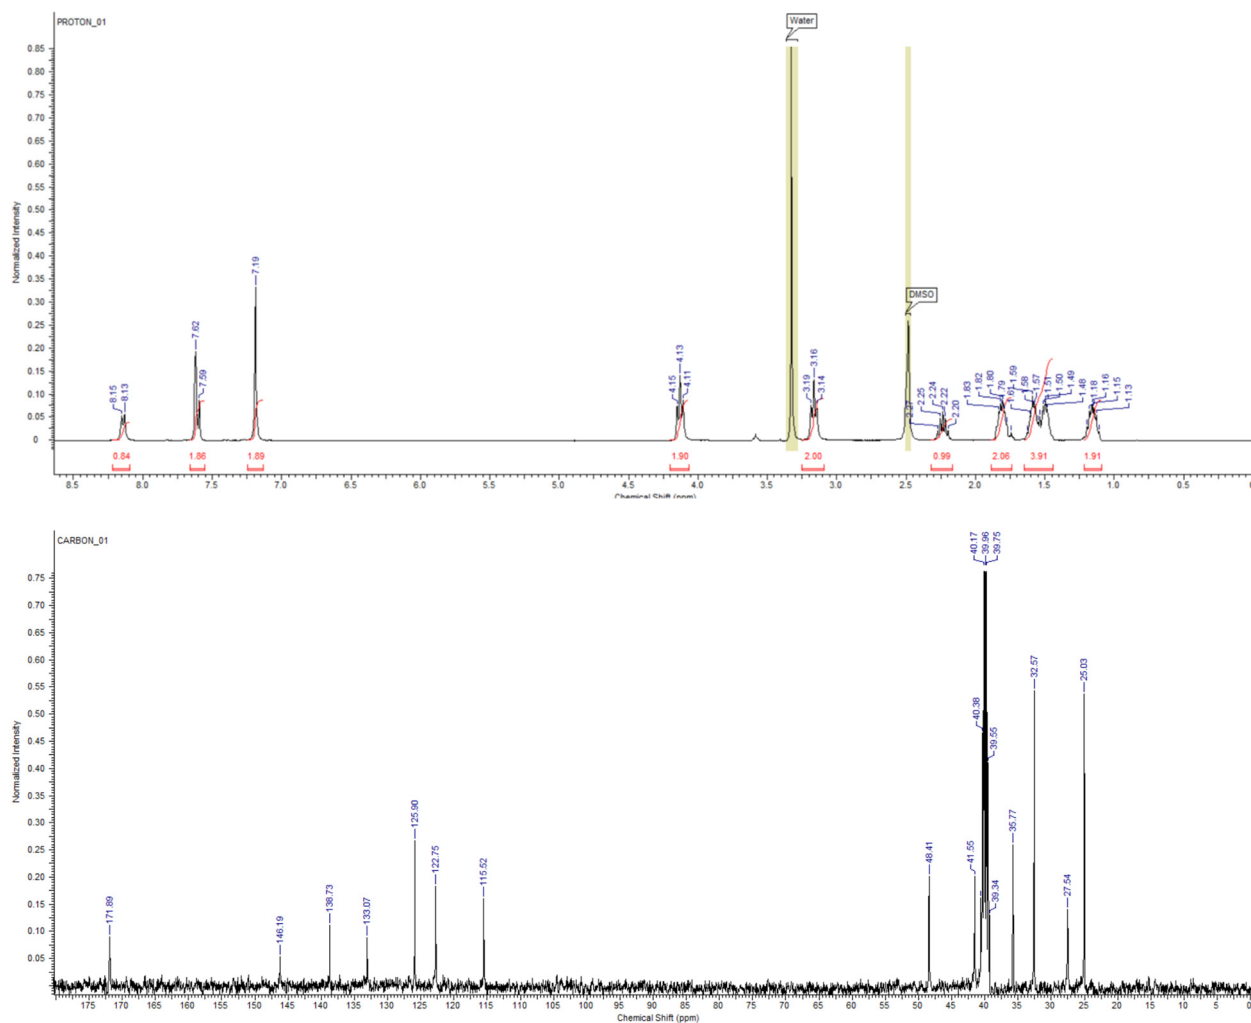

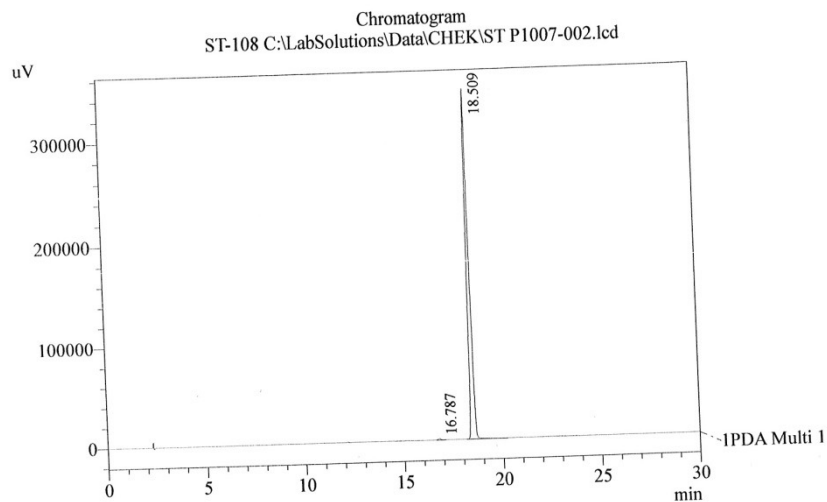

1 PDA Multi 1 / 300nm 4nm

PDA Ch1 300nm 4nm

| Peak# | Ret. Time | Area    | Height | Area %  |
|-------|-----------|---------|--------|---------|
| 1     | 16.787    | 11915   | 1321   | 0.383   |
| 2     | 18.509    | 3102682 | 343899 | 99.617  |
| Total |           | 3114597 | 345219 | 100.000 |

Method Filename : FOS B.lcm 07.10.2020 15:28:05

| Time  | Unit       | Command | Valu |
|-------|------------|---------|------|
| 0.01  | Pumps      | B.Conc  | 30   |
| 30.00 | Pumps      | B.Conc  | 70   |
| 33.00 | Pumps      | B.Conc  | 30   |
| 45.00 | Controller | Stop    |      |

Shimadzu LC-20 AD; System - FOS Colon- Kromasil-100-5mkm. C-18, 4,6x250 mm. N 62511  
Elution: A - H3PO4 0,01M pH 2,6; B - MeCN, fl - 1.0 ml/min, loop 20 mkl

# 1-(cyclohexanecarbonyl)indoline-5-sulfonamide (**4u**)

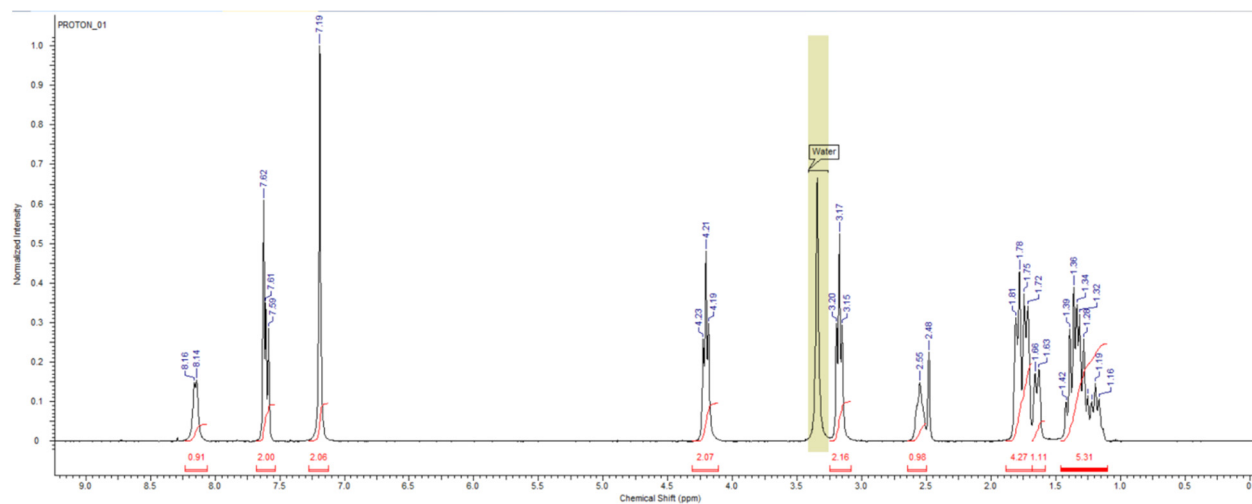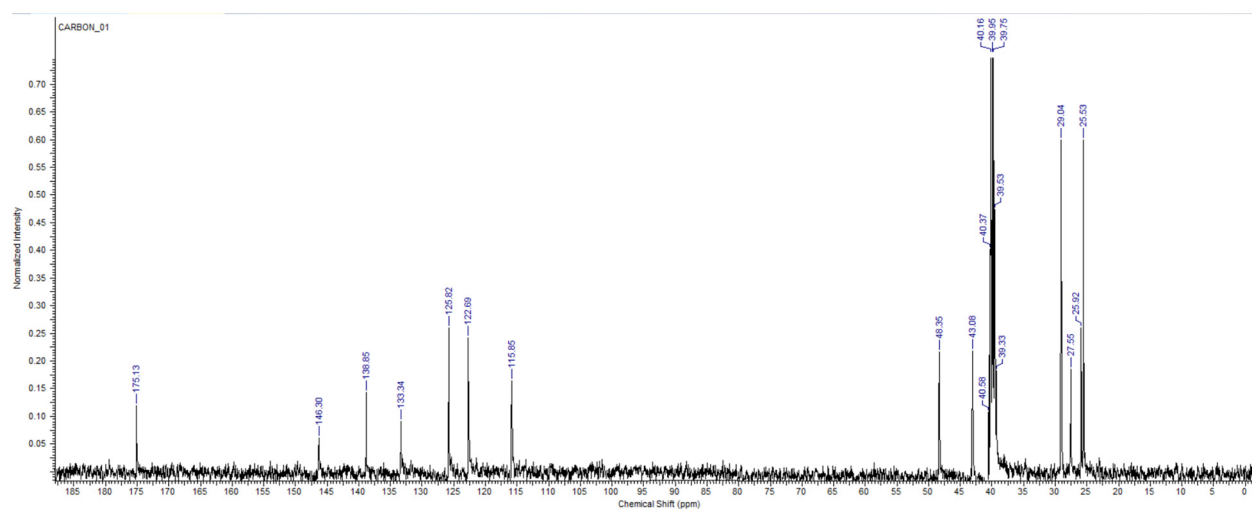

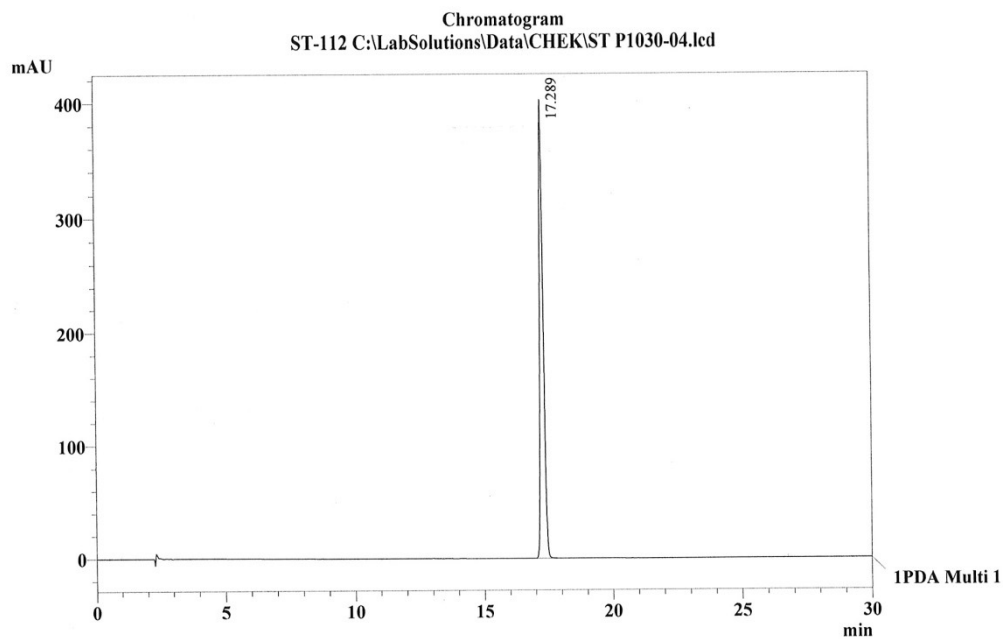

1 PDA Multi 1 / 300nm 4nm

PeakTable

PDA Ch1 300nm 4nm

| Peak# | Ret. Time | Area    | Height | Area %  |
|-------|-----------|---------|--------|---------|
| 1     | 17.289    | 3894839 | 402546 | 100.000 |
| Total |           | 3894839 | 402546 | 100.000 |

| <<LC Program>> |            | Method  |       |
|----------------|------------|---------|-------|
| Time           | Unit       | Command | Value |
| 0.10           | Pumps      | B.Conc  | 30    |
| 30.00          | Pumps      | B.Conc  | 70    |
| 33.00          | Pumps      | B.Conc  | 30    |
| 45.00          | Controller | Stop    |       |

Method Filename : FOS B.lcm

Shimadzu LC-20AD; 2-System FOS, Colon Kromasil 100-C18, size 5mkm, 4,6\*250mm, N 86912  
Elution: A - H3PO4 0.01M pH 2.6; B - MeCN, fl. 1,0 ml/min, loop 20mk1.

# 1-benzylindoline-5-sulfonamide (10)

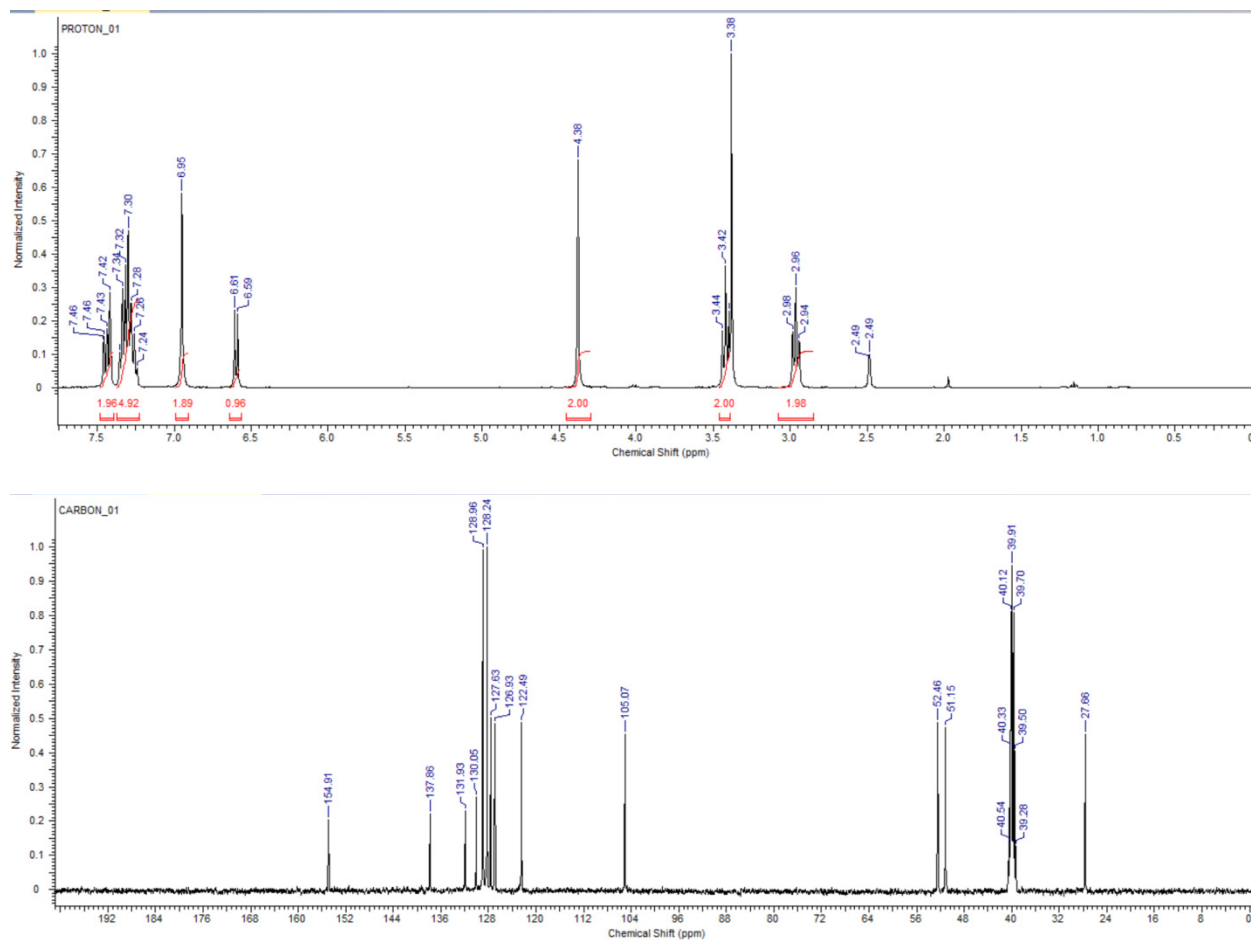

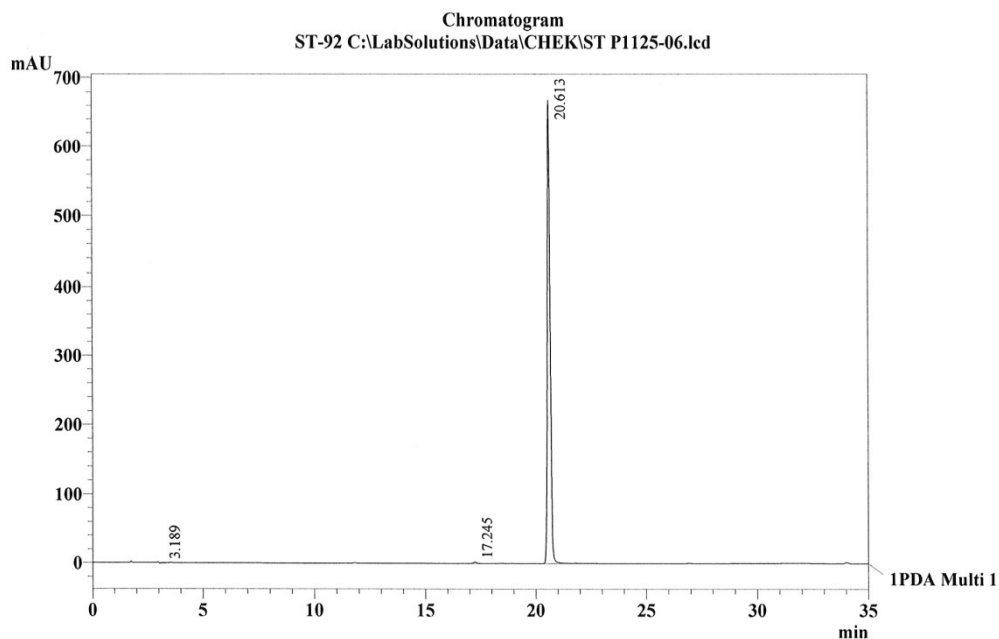

1 PDA Multi 1 / 290nm 4nm

PeakTable

| PDA Ch1 290nm 4nm |           |         |        |         |
|-------------------|-----------|---------|--------|---------|
| Peak#             | Ret. Time | Area    | Height | Area %  |
| 1                 | 3.189     | 11981   | 664    | 0.198   |
| 2                 | 17.245    | 19525   | 2087   | 0.323   |
| 3                 | 20.613    | 6005808 | 668401 | 99.478  |
| Total             |           | 6037313 | 671152 | 100.000 |

| <<LC Program>> |            | Method  |       |  |
|----------------|------------|---------|-------|--|
| Time           | Unit       | Command | Value |  |
| 0.10           | Pumps      | B.Conc  | 30    |  |
| 30.00          | Pumps      | B.Conc  | 70    |  |
| 33.00          | Pumps      | B.Conc  | 30    |  |
| 45.00          | Controller | Stop    |       |  |

Method Filename : FOS B.lcm

Shimadzu LC-20AD; 2-System FOS, Colon Kromasil 100-C18,.size 5mkm, 4,6\*250mm, N 86912  
Elution: A - H3PO4 0.01M pH 2.6; B - MeCN, fl. 1,0 ml/min, loop 20mkl.
